# Supplementary material for: Effect of Dupilumab on Laboratory Parameters in Adolescents with Atopic Dermatitis: Results from a Randomized, Placebo-Controlled, Phase 3 Clinical Trial
Source: Springer Nature journal article supplement (doi:10.1007/s40257-020-00583-3), 2021-03-01
Supplement: MOESM2 [file 18925634]

Dupilumab Lab Safety in Adolescents with Atopic Dermatitis

**Electronic supplementary material**

**Effect of Dupilumab on Laboratory Parameters in Adolescents with Atopic Dermatitis: Results from a Randomized Placebo-Controlled Phase 3 Clinical Trial**

Elaine C. Siegfried, Thomas Bieber, Eric L. Simpson, Amy S. Paller, Lisa A. Beck, Mark Boguniewicz, Lynda C. Schneider, Faisal A. Khokhar, Zhen Chen, Randy Prescilla, Paola Mina-Osorio, Ashish Bansal

**Corresponding author:** Ashish Bansal

**Email:** [ashish.bansal@regeneron.com](mailto:ashish.bansal@regeneron.com)

**Journal:** American Journal of Clinical Dermatology

**Table of contents**

Supplemental Table S1 Baseline demographics .....3

Supplemental Table S2a Summary statistics for hematology laboratory parameters: red blood cells and platelets.....4

Supplemental Table S2b Proportion of patients with Grades 1–3 anemia, n1/N2 (%) .....6

Supplemental Table S2c Shift from baseline: platelets ( $\times 10^9/L$ ).....7

Supplemental Table S3a Summary statistics for hematology laboratory parameters: white blood cells .....8

Supplemental Table S3b Shift from baseline: white blood cells .....11

Supplemental Table S4a Summary statistics for serum chemistry laboratory parameters: metabolic function .....12

Supplemental Table S4b Summary statistics for serum chemistry laboratory parameters: electrolytes.....13

Supplemental Table S4c Summary statistics for serum chemistry laboratory parameters: renal function .....15

Supplemental Table S4d Summary statistics for serum chemistry laboratory parameters: liver function.....16

Supplemental Table S4e Summary statistics for serum chemistry laboratory parameters: lipid panel .....18

Supplemental Table S5 Shift from baseline: lactate dehydrogenase (U/L) .....19

Supplemental Table S6a Proportion of patients with Grades 1–4 increases in ALP, n1/n2 (%) .....20

Supplemental Table S6b Proportion of patients with Grades 1–4 increases in bilirubin, n1/n2 (%).....21

Supplemental Table S6c Proportion of patients with Grades 1–4 increases in ALT, n1/n2 (%) .....22

Supplemental Table S6d Proportion of patients with Grades 1–4 increases in AST, n1/n2 (%) .....23

Supplemental Table S6e Proportion of patients with Grades 1–4 increases in creatinine, n1/n2 (%) .....24

Supplemental Table S6f Proportion of patients with Grades 1–4 increases in potassium, n1/n2 (%) .....25

Supplemental Table S7 Summary statistics for urinalysis laboratory parameters .....26

**Supplemental Table S1** Baseline demographics

|                                   | Placebo<br>( <i>n</i> = 85) | Dupilumab<br>300 mg q4w<br>( <i>n</i> = 84) | Dupilumab<br>200/300 mg q2w<br>( <i>n</i> = 82) |
|-----------------------------------|-----------------------------|---------------------------------------------|-------------------------------------------------|
| Age, mean (SD), year              | 14.5 (1.8)                  | 14.4 (1.6)                                  | 14.5 (1.7)                                      |
| Age group, year                   |                             |                                             |                                                 |
| ≥ 12 to < 15                      | 41 (48.2)                   | 45 (53.6)                                   | 43 (52.4)                                       |
| ≥ 15 to < 18                      | 44 (51.8)                   | 39 (46.4)                                   | 39 (47.6)                                       |
| Male                              | 53 (62.4)                   | 52 (61.9)                                   | 43 (52.4)                                       |
| Ethnicity                         |                             |                                             |                                                 |
| Not Hispanic or Latino            | 72 (84.7)                   | 64 (76.2)                                   | 69 (84.1)                                       |
| Hispanic or Latino                | 13 (15.3)                   | 20 (23.8)                                   | 13 (15.9)                                       |
| Race                              |                             |                                             |                                                 |
| White                             | 48 (56.5)                   | 55 (65.5)                                   | 54 (65.9)                                       |
| Black or African American         | 15 (17.6)                   | 8 (9.5)                                     | 7 (8.5)                                         |
| Asian                             | 13 (15.3)                   | 13 (15.5)                                   | 12 (14.6)                                       |
| Weight, mean (SD), kg             | 64.4 (21.5)                 | 65.8 (20.1)                                 | 65.6 (24.5)                                     |
| Weight group                      |                             |                                             |                                                 |
| < 60 kg                           | 43 (50.6)                   | 42 (50.0)                                   | 43 (52.4)                                       |
| ≥ 60 kg                           | 42 (49.4)                   | 42 (50.0)                                   | 39 (47.6)                                       |
| BMI, mean (SD), kg/m <sup>2</sup> | 23.9 (6.0)                  | 24.1 (5.9)                                  | 24.9 (7.9)                                      |

Data are *n* (%), unless otherwise specified.

*BMI* body mass index, *q2w* every 2 weeks, *q4w* every 4 weeks, *SD* standard deviation

Data from table 1 in Simpson EL, et al. Efficacy and safety dupilumab in adolescents with uncontrolled moderate to severe atopic dermatitis a phase 3 randomized clinical trial. *JAMA Dermatol.* 2020;156:44–56.

**Supplemental Table S2a** Summary statistics for hematology laboratory parameters: red blood cells and platelets

| Laboratory parameter                                                                                                                | Measurement                                             | Study week     | Placebo<br>( <i>n</i> = 85) | Dupilumab 200/300 mg<br>q2w ( <i>n</i> = 82) | Dupilumab 300 mg<br>q4w ( <i>n</i> = 83) |
|-------------------------------------------------------------------------------------------------------------------------------------|---------------------------------------------------------|----------------|-----------------------------|----------------------------------------------|------------------------------------------|
| <b>Hematocrit (%)</b><br>NR (age 13–17 years)<br>Male: 33.9–43.5<br>Female: 33.4–40.4                                               | Median<br>(Q1, Q3), <i>n</i> 1                          | BL             | 43.0 (40.3, 45.0), 85       | 42.0 (39.7, 45.9), 82                        | 43.2 (40.4, 45.8), 83                    |
|                                                                                                                                     |                                                         | 4              | 42.8 (40.4, 44.9), 79       | 41.5 (39.3, 44.9), 81                        | 42.6 (40.0, 45.0), 79                    |
|                                                                                                                                     |                                                         | 8              | 43.2 (40.3, 45.4), 76       | 42.0 (39.2, 45.6), 76                        | 43.3 (39.6, 45.7), 78                    |
|                                                                                                                                     |                                                         | 16             | 41.9 (40.0, 45.3), 72       | 41.4 (38.8, 45.2), 75                        | 42.4 (39.0, 44.7), 78                    |
|                                                                                                                                     | Mean change<br>from baseline ( $\pm$<br>SD), <i>n</i> 1 | 4              | 0 (2.7), 79                 | –0.5 (2.4), 81                               | –0.3 (2.4), 79                           |
|                                                                                                                                     |                                                         | 8              | –0.1 (2.5), 76              | –0.5 (2.3), 76                               | –0.1 (2.6), 78                           |
| 16                                                                                                                                  |                                                         | –0.5 (3.0), 72 | –0.8 (2.4), 75              | –0.7 (2.8), 78                               |                                          |
| <b>Hemoglobin (g/L)</b><br>NR (age 13–17 years)<br>Male: 110–145<br>Female: 108–133                                                 | Median<br>(Q1, Q3), <i>n</i> 1                          | BL             | 140.0 (133.0, 150.0), 85    | 140.0 (131.0, 150.0), 82                     | 143.0 (133.0, 151.0), 83                 |
|                                                                                                                                     |                                                         | 4              | 140.0 (134.0, 149.0), 79    | 138.0 (129.0, 149.0), 81                     | 141.0 (134.0, 151.0), 79                 |
|                                                                                                                                     |                                                         | 8              | 142.5 (133.0, 150.0), 76    | 138.5 (128.5, 149.5), 76                     | 143.0 (132.0, 151.0), 78                 |
|                                                                                                                                     |                                                         | 16             | 138.5 (133.5, 149.5), 72    | 138.0 (128.0, 152.0), 75                     | 143.0 (131.0, 149.0), 78                 |
|                                                                                                                                     | Mean change<br>from baseline ( $\pm$<br>SD), <i>n</i> 1 | 4              | 0.1 (7.8), 79               | –1.2 (7.3), 81                               | –0.5 (7.3), 79                           |
|                                                                                                                                     |                                                         | 8              | 0.3 (7.5), 76               | –0.9 (7.3), 76                               | 0.3 (8.5), 78                            |
| 16                                                                                                                                  |                                                         | –0.8 (9.5), 72 | –1.2 (8.3), 75              | –0.8 (8.7), 78                               |                                          |
| <b>Erythrocyte mean corpuscular hemoglobin (pg)</b><br>NR (age 13–17 years)<br>Male: 25.2–30.2<br>Female: 24.8–30.2                 | Median<br>(Q1, Q3), <i>n</i> 1                          | BL             | 28.5 (27.6, 29.5), 85       | 28.4 (27.4, 29.5), 82                        | 29.1 (27.8, 29.8), 83                    |
|                                                                                                                                     |                                                         | 4              | 28.5 (27.4, 29.3), 79       | 28.3 (27.4, 29.5), 81                        | 29.0 (27.7, 29.7), 79                    |
|                                                                                                                                     |                                                         | 8              | 28.3 (27.5, 29.3), 76       | 28.4 (27.3, 29.5), 76                        | 29.0 (27.5, 29.7), 78                    |
|                                                                                                                                     |                                                         | 16             | 28.4 (27.4, 29.5), 72       | 28.4 (27.2, 29.4), 75                        | 29.0 (27.4, 29.6), 78                    |
|                                                                                                                                     | Mean change<br>from baseline ( $\pm$<br>SD), <i>n</i> 1 | 4              | –0.1 (0.6), 79              | –0 (0.5), 81                                 | –0.1 (0.6), 79                           |
|                                                                                                                                     |                                                         | 8              | –0.1 (0.5), 76              | –0.1 (0.6), 76                               | –0.2 (1.0), 78                           |
| 16                                                                                                                                  |                                                         | –0.2 (0.5), 72 | –0.1 (0.6), 75              | –0.2 (1.2), 78                               |                                          |
| <b>Erythrocyte mean corpuscular hemoglobin concentration (g/dL)</b><br>NR (age 13–17 years)<br>Male: 31.8–34.8<br>Female: 31.5–34.2 | Median<br>(Q1, Q3), <i>n</i> 1                          | BL             | 33.0 (32.5, 33.6), 85       | 32.9 (32.5, 33.5), 82                        | 33.0 (32.6, 33.5), 83                    |
|                                                                                                                                     |                                                         | 4              | 33.0 (32.4, 33.5), 79       | 33.1 (32.6, 33.5), 81                        | 33.3 (32.7, 33.7), 79                    |
|                                                                                                                                     |                                                         | 8              | 33.1 (32.7, 33.6), 76       | 33.1 (32.6, 33.5), 76                        | 33.3 (32.8, 33.6), 78                    |
|                                                                                                                                     |                                                         | 16             | 33.4 (32.8, 33.7), 72       | 33.3 (32.8, 33.8), 75                        | 33.4 (32.9, 33.8), 78                    |
|                                                                                                                                     | Mean change<br>from baseline ( $\pm$<br>SD), <i>n</i> 1 | 4              | 0 (0.8), 79                 | 0.2 (0.8), 81                                | 0.1 (0.8), 79                            |
|                                                                                                                                     |                                                         | 8              | 0.1 (0.8), 76               | 0.2 (0.8), 76                                | 0.1 (0.9), 78                            |
| 16                                                                                                                                  |                                                         | 0.2 (0.8), 72  | 0.4 (0.7), 75               | 0.3 (0.8), 78                                |                                          |

Dupilumab Lab Safety in Adolescents with Atopic Dermatitis

| Laboratory parameter                                                                                                | Measurement                                  | Study week | Placebo<br>( <i>n</i> = 85) | Dupilumab 200/300 mg<br>q2w ( <i>n</i> = 82) | Dupilumab 300 mg<br>q4w ( <i>n</i> = 83) |
|---------------------------------------------------------------------------------------------------------------------|----------------------------------------------|------------|-----------------------------|----------------------------------------------|------------------------------------------|
| <b>Erythrocyte mean corpuscular volume (fL)</b><br><br>NR (age 13–17 years)<br>Male: 76.7–89.2<br>Female: 76.9–90.6 | Median<br>(Q1, Q3), <i>n</i> 1               | BL         | 86.5 (83.7, 89.2), 85       | 86.5 (83.3, 89.3), 82                        | 87.0 (84.2, 89.5), 83                    |
|                                                                                                                     |                                              | 4          | 85.7 (83.0, 89.7), 79       | 86.1 (82.9, 88.7), 81                        | 86.8 (83.6, 89.0), 79                    |
|                                                                                                                     |                                              | 8          | 85.4 (82.4, 88.3), 76       | 85.8 (82.4, 88.4), 76                        | 86.7 (83.3, 88.8), 78                    |
|                                                                                                                     |                                              | 16         | 85.3 (82.7, 87.6), 72       | 84.5 (81.4, 88.3), 75                        | 85.7 (82.9, 88.1), 78                    |
|                                                                                                                     | Mean change from baseline (± SD), <i>n</i> 1 | 4          | −0.3 (1.7), 79              | −0.5 (2.0), 81                               | −0.5 (2.0), 79                           |
|                                                                                                                     |                                              | 8          | −0.8 (1.8), 76              | −0.8 (2.1), 76                               | −0.7 (2.9), 78                           |
|                                                                                                                     |                                              | 16         | −1.3 (2.1), 72              | −1.4 (2.1), 75                               | −1.4 (3.5), 78                           |
| <b>Erythrocytes (10<sup>12</sup>/L)</b><br><br>NR (age 13–17 years)<br>Male: 4.0–5.3<br>Female: 3.9–4.9             | Median<br>(Q1, Q3), <i>n</i> 1               | BL         | 4.9 (4.7, 5.3), 85          | 4.9 (4.6, 5.3), 82                           | 5.0 (4.6, 5.3), 83                       |
|                                                                                                                     |                                              | 4          | 5.0 (4.6, 5.3), 79          | 4.9 (4.6, 5.2), 81                           | 5.0 (4.7, 5.3), 79                       |
|                                                                                                                     |                                              | 8          | 5.0 (4.7, 5.3), 76          | 4.9 (4.6, 5.2), 76                           | 5.0 (4.7, 5.3), 78                       |
|                                                                                                                     |                                              | 16         | 4.9 (4.7, 5.3), 72          | 5.0 (4.7, 5.3), 75                           | 5.0 (4.7, 5.2), 78                       |
|                                                                                                                     | Mean change from baseline (± SD), <i>n</i> 1 | 4          | 0 (0.3), 79                 | 0 (0.3), 81                                  | 0 (0.3), 79                              |
|                                                                                                                     |                                              | 8          | 0 (0.3), 76                 | 0 (0.3), 76                                  | 0 (0.3), 78                              |
|                                                                                                                     |                                              | 16         | 0 (0.3), 72                 | 0 (0.3), 75                                  | 0 (0.3), 78                              |
| <b>Platelets (10<sup>9</sup>/L)</b><br><br>NR (age 13–17 years)<br>Male: 159–353<br>Female: 138–345                 | Median<br>(Q1, Q3), <i>n</i> 1               | BL         | 294.0 (248.0, 327.0), 83    | 296.5 (240.0, 340.0), 82                     | 298.5 (237.0, 331.0), 82                 |
|                                                                                                                     |                                              | 4          | 293.0 (249.0, 337.0), 75    | 282.5 (232.0, 331.0), 78                     | 279.5 (236.0, 316.0), 78                 |
|                                                                                                                     |                                              | 8          | 275.0 (248.0, 322.0), 73    | 277.0 (231.0, 322.0), 75                     | 272.0 (236.5, 319.5), 76                 |
|                                                                                                                     |                                              | 16         | 273.0 (238.0, 326.0), 69    | 277.0 (232.0, 320.0), 74                     | 265.0 (231.0, 318.0), 77                 |
|                                                                                                                     | Mean change from baseline (± SD), <i>n</i> 1 | 4          | 2.6 (42.1), 74              | −11.1 (46.2), 78                             | −11.3 (41.8), 77                         |
|                                                                                                                     |                                              | 8          | −8.3 (38.9), 72             | −15.9 (41.5), 75                             | −14.7 (49.7), 75                         |
|                                                                                                                     |                                              | 16         | −8.1 (44.2), 67             | −17.6 (58.1), 74                             | −15.4 (50.1), 76                         |

*BL* baseline, *n* total number of patients in the treatment group, *n*1 number of patients at visit, *NR* normal range, *Q*1 quartile 1, *Q*3 quartile 3, *q*2w every 2 weeks, *q*4w every 4 weeks, *SD* standard deviation

**Supplemental Table S2b** Proportion of patients with grades 1–3 anemia, *n1/n2* (%)

| Time point | Grade                            | Placebo<br>( <i>n</i> = 85) | Dupilumab<br>200/300 mg q2w<br>( <i>n</i> = 82) | Dupilumab<br>300 mg q4w<br>( <i>n</i> = 83) |
|------------|----------------------------------|-----------------------------|-------------------------------------------------|---------------------------------------------|
| Baseline   | Grade 1 (Mild): < LLN–100 g/L    | 0/85                        | 0/82                                            | 1/83 (1.2)                                  |
|            | Grade 2 (Moderate): < 100–80 g/L | 0/85                        | 0/82                                            | 0/83                                        |
|            | Grade 3 (Severe): < 80 g/L       | 0/85                        | 0/82                                            | 0/83                                        |
| Week 4     | Grade 1 (Mild): < LLN–100 g/L    | 2/79 (2.5)                  | 0/81                                            | 0/79                                        |
|            | Grade 2 (Moderate): < 100–80 g/L | 1/79 (1.3)                  | 0/81                                            | 0/79                                        |
|            | Grade 3 (Severe): < 80 g/L       | 0/79                        | 0/81                                            | 0/79                                        |
| Week 8     | Grade 1 (Mild): < LLN–100 g/L    | 0/76                        | 0/76                                            | 0/78                                        |
|            | Grade 2 (Moderate): < 100–80 g/L | 1/76 (1.3)                  | 0/76                                            | 0/78                                        |
|            | Grade 3 (Severe): < 80 g/L       | 0/76                        | 0/76                                            | 0/78                                        |
| Week 16    | Grade 1 (Mild): < LLN–100 g/L    | 0/72                        | 0/75                                            | 1/78 (1.3)                                  |
|            | Grade 2 (Moderate): < 100–80 g/L | 1/72 (1.4)                  | 0/75                                            | 1/78 (1.3)                                  |
|            | Grade 3 (Severe): < 80 g/L       | 0/72                        | 0/75                                            | 0/78                                        |

Patients may have had grades 1–2 changes at more than one time point

*n1/n2* number of patients with grade/number of patients assessed at that time point, *q2w* every 2 weeks, *q4w* every 4 weeks, *LLN* lower limit of normal

**Supplemental Table S2c** Shift from baseline: platelets ( $\times 10^9/L$ )

| Study week | Evaluation $n1/n2$ (%) | Placebo ( $n = 85$ ) |              |              | Dupilumab 200/300 mg q2w ( $n = 82$ ) |              |              | Dupilumab 300 mg q4w ( $n = 83$ ) |              |              |
|------------|------------------------|----------------------|--------------|--------------|---------------------------------------|--------------|--------------|-----------------------------------|--------------|--------------|
|            |                        | Baseline status      |              |              |                                       |              |              |                                   |              |              |
|            |                        | Low                  | Normal       | High         | Low                                   | Normal       | High         | Low                               | Normal       | High         |
| 4          | Low                    | 1/2 (50.0)           | 0/56         | 0/16         | 0/0                                   | 0/55         | 0/23         | 1/1 (100)                         | 0/60         | 0/16         |
|            | Normal                 | 1/2 (50.0)           | 52/56 (92.9) | 3/16 (18.8)  | 0/0                                   | 54/55 (98.2) | 5/23 (21.7)  | 0/1                               | 57/60 (95.0) | 8/16 (50.0)  |
|            | High                   | 0/2                  | 4/56 (7.1)   | 13/16 (81.3) | 0/0                                   | 1/55 (1.8)   | 18/23 (78.3) | 0/1                               | 3/60 (5.0)   | 8/16 (50.0)  |
| 8          | Low                    | 1/1 (100)            | 1/57 (1.8)   | 0/14         | 0/0                                   | 0/54         | 0/21         | 1/1 (100)                         | 0/56         | 0/18         |
|            | Normal                 | 0/1                  | 53/57 (93.0) | 4/14 (28.6)  | 0/0                                   | 53/54 (98.1) | 8/21 (38.1)  | 0/1                               | 52/56 (92.9) | 9/18 (50.0)  |
|            | High                   | 0/1                  | 3/57 (5.3)   | 10/14 (71.4) | 0/0                                   | 1/54 (1.9)   | 13/21 (61.9) | 0/1                               | 4/56 (7.1)   | 9/18 (50.0)  |
| 16         | Low                    | 1/2 (50.0)           | 0/54         | 0/11         | 0/0                                   | 1/53 (1.9)   | 0/21         | 0/1                               | 0/58         | 0/17         |
|            | Normal                 | 1/2 (50.0)           | 53/54 (98.1) | 4/11 (36.4)  | 0/0                                   | 50/53 (94.3) | 12/21 (57.1) | 1/1 (100)                         | 55/58 (94.8) | 12/17 (70.6) |
|            | High                   | 0/2                  | 1/54 (1.9)   | 7/11 (63.6)  | 0/0                                   | 2/53 (3.8)   | 9/21 (42.9)  | 0/1                               | 3/58 (5.2)   | 5/17 (29.4)  |

$n$  total number of patients in the treatment group,  $n1$  number of patients with evaluation level at visit,  $n2$  number of patients with baseline status,  $q2w$  every 2 weeks,  $q4w$  every 4 weeks

**Supplemental Table S3a** Summary statistics for hematology laboratory parameters: white blood cells

| Laboratory parameter                                                                                 | Measurement                                        | Study week | Placebo<br>( <i>n</i> = 85) | Dupilumab 200/300 mg<br>q2w ( <i>n</i> = 82) | Dupilumab 300 mg<br>q4w ( <i>n</i> = 83) |
|------------------------------------------------------------------------------------------------------|----------------------------------------------------|------------|-----------------------------|----------------------------------------------|------------------------------------------|
| <b>Leukocytes (10<sup>9</sup>/L)</b><br><br>NR (age 13–17 years)<br>Male: 3.8–9.8<br>Female: 4.2–9.4 | Median<br>(Q1, Q3), <i>n</i> 1                     | BL         | 7.9 (6.4, 9.0), 85          | 7.7 (6.5, 8.8), 82                           | 7.6 (6.5, 9.6), 83                       |
|                                                                                                      |                                                    | 4          | 7.6 (6.4, 8.7), 79          | 7.6 (6.4, 8.9), 81                           | 7.4 (6.1, 8.6), 79                       |
|                                                                                                      |                                                    | 8          | 7.4 (6.2, 8.2), 76          | 7.8 (6.2, 9.6), 76                           | 7.7 (6.3, 9.4), 78                       |
|                                                                                                      |                                                    | 16         | 7.7 (6.4, 8.6), 72          | 7.3 (6.4, 9.1), 75                           | 7.2 (6.2, 9.1), 78                       |
|                                                                                                      | Mean change<br>from baseline (±<br>SD), <i>n</i> 1 | 4          | −0.1 (1.9), 79              | 0 (2.0), 81                                  | −0.3 (1.7), 79                           |
|                                                                                                      |                                                    | 8          | −0.4 (1.6), 76              | 0.2 (2.0), 76                                | 0.1 (2.1), 78                            |
|                                                                                                      |                                                    | 16         | −0.3 (1.8), 72              | 0 (2.3), 75                                  | −0.4 (1.8), 78                           |
| <b>Basophils (10<sup>9</sup>/L)</b><br><br>NR (age 13–17 years)<br>All: 0–0.20                       | Median<br>(Q1, Q3), <i>n</i> 1                     | BL         | 0.03 (0.02, 0.04), 85       | 0.03 (0.02, 0.04), 82                        | 0.03 (0.02, 0.03), 83                    |
|                                                                                                      |                                                    | 4          | 0.03 (0.02, 0.04), 78       | 0.03 (0.02, 0.05), 81                        | 0.03 (0.02, 0.04), 79                    |
|                                                                                                      |                                                    | 8          | 0.02 (0.01, 0.04), 76       | 0.03 (0.02, 0.04), 76                        | 0.03 (0.02, 0.04), 78                    |
|                                                                                                      |                                                    | 16         | 0.03 (0.01, 0.04), 72       | 0.03 (0.02, 0.04), 74                        | 0.02 (0.01, 0.04), 78                    |
|                                                                                                      | Mean change<br>from baseline (±<br>SD), <i>n</i> 1 | 4          | 0 (0.02), 78                | 0 (0.02), 81                                 | 0 (0.02), 79                             |
|                                                                                                      |                                                    | 8          | 0 (0.02), 76                | 0.01 (0.03), 76                              | 0 (0.02), 78                             |
|                                                                                                      |                                                    | 16         | 0 (0.02), 72                | 0.02 (0.10), 74                              | 0 (0.03), 78                             |
| <b>Basophils/<br/>leukocytes (%)</b><br><br>NR (age 13–17 years)<br>All: 1.0–2.0                     | Median<br>(Q1, Q3), <i>n</i> 1                     | BL         | 0.3 (0.3, 0.5), 85          | 0.4 (0.2, 0.5), 82                           | 0.3 (0.2, 0.4), 83                       |
|                                                                                                      |                                                    | 4          | 0.3 (0.2, 0.5), 78          | 0.4 (0.3, 0.5), 81                           | 0.4 (0.3, 0.5), 79                       |
|                                                                                                      |                                                    | 8          | 0.3 (0.2, 0.5), 76          | 0.4 (0.2, 0.5), 76                           | 0.4 (0.2, 0.5), 78                       |
|                                                                                                      |                                                    | 16         | 0.3 (0.2, 0.5), 72          | 0.4 (0.2, 0.5), 74                           | 0.3 (0.2, 0.5), 78                       |
|                                                                                                      | Mean change<br>from baseline (±<br>SD), <i>n</i> 1 | 4          | 0 (0.3), 78                 | 0.1 (0.3), 81                                | 0.1 (0.3), 79                            |
|                                                                                                      |                                                    | 8          | 0 (0.3), 76                 | 0.1 (0.3), 76                                | 0 (0.2), 78                              |
|                                                                                                      |                                                    | 16         | 0 (0.3), 72                 | 0.2 (1.7), 74                                | 0 (0.3), 78                              |
| <b>Eosinophils<br/>(10<sup>9</sup>/L)</b><br><br>NR (age 13–17 years)<br>All: 0–0.50                 | Median<br>(Q1, Q3), <i>n</i> 1                     | BL         | 0.7 (0.3, 1.1), 85          | 0.6 (0.4, 1.1), 82                           | 0.7 (0.4, 1.0), 83                       |
|                                                                                                      |                                                    | 4          | 0.6 (0.3, 1.0), 78          | 0.6 (0.3, 1.1), 81                           | 0.6 (0.3, 1.1), 79                       |
|                                                                                                      |                                                    | 8          | 0.6 (0.3, 1.0), 76          | 0.6 (0.4, 1.1), 76                           | 0.6 (0.3, 1.3), 78                       |
|                                                                                                      |                                                    | 16         | 0.6 (0.3, 1.0), 72          | 0.6 (0.4, 1.0), 74                           | 0.5 (0.3, 0.9), 78                       |
|                                                                                                      | Mean change<br>from baseline (±<br>SD), <i>n</i> 1 | 4          | −0.1 (0.4), 78              | 0 (0.6), 81                                  | 0 (0.5), 79                              |
|                                                                                                      |                                                    | 8          | −0.1 (0.5), 76              | 0.2 (0.8), 76                                | 0.2 (0.7), 78                            |
|                                                                                                      |                                                    | 16         | −0.1 (0.5), 72              | 0 (0.8), 74                                  | −0.1 (0.5), 78                           |



Dupilumab Lab Safety in Adolescents with Atopic Dermatitis

| Laboratory parameter                   | Measurement                                     | Study week     | Placebo<br>(n = 85)   | Dupilumab 200/300 mg<br>q2w (n = 82) | Dupilumab 300 mg<br>q4w (n = 83) |
|----------------------------------------|-------------------------------------------------|----------------|-----------------------|--------------------------------------|----------------------------------|
| <b>Eosinophils/<br/>leukocytes (%)</b> | Median<br>(Q1, Q3), n1                          | BL             | 9.2 (4.9, 13.7), 85   | 8.2 (5.3, 13.7), 82                  | 8.8 (5.5, 14.2), 83              |
|                                        |                                                 | 4              | 8.0 (4.6, 13.2), 78   | 8.8 (4.3, 13.7), 81                  | 8.7 (4.4, 14.2), 79              |
|                                        |                                                 | 8              | 8.3 (5.3, 13.5), 76   | 8.9 (5.3, 14.9), 76                  | 8.1 (3.6, 16.6), 78              |
|                                        |                                                 | 16             | 7.8 (4.9, 13.0), 72   | 8.7 (4.2, 12.6), 73                  | 7.4 (3.9, 14.0), 78              |
|                                        | Mean change<br>from baseline ( $\pm$<br>SD), n1 | 4              | -0.7 (4.6), 78        | 0.1 (5.0), 81                        | 0.5 (5.2), 79                    |
|                                        |                                                 | 8              | -0.6 (5.4), 76        | 1.2 (6.8), 76                        | 1.4 (7.2), 78                    |
| 16                                     |                                                 | -0.7 (5.5), 72 | -0.1 (6.5), 73        | -0.8 (6.2), 78                       |                                  |
| <b>Lymphocytes (10<sup>9</sup>/L)</b>  | Median<br>(Q1, Q3), n1                          | BL             | 2.1 (1.8, 2.6), 85    | 2.1 (1.7, 2.6), 82                   | 2.0 (1.6, 2.5), 83               |
|                                        |                                                 | 4              | 2.2 (1.8, 2.5), 78    | 2.3 (2.0, 2.7), 81                   | 2.1 (1.8, 2.6), 79               |
|                                        |                                                 | 8              | 2.1 (1.7, 2.5), 76    | 2.3 (1.9, 2.8), 76                   | 2.2 (1.7, 2.7), 78               |
|                                        |                                                 | 16             | 2.1 (1.7, 2.7), 72    | 2.3 (1.9, 2.6), 74                   | 2.0 (1.8, 2.6), 78               |
|                                        | Mean change<br>from baseline ( $\pm$<br>SD), n1 | 4              | 0 (0.5), 78           | 0.2 (0.5), 81                        | 0.1 (0.5), 79                    |
|                                        |                                                 | 8              | 0 (0.5), 76           | 0.2 (0.6), 76                        | 0.2 (0.7), 78                    |
| 16                                     |                                                 | 0 (0.5), 72    | 0.1 (0.5), 74         | 0.1 (0.6), 78                        |                                  |
| <b>Lymphocytes/<br/>leukocytes (%)</b> | Median<br>(Q1, Q3), n1                          | BL             | 29.2 (22.5, 36.3), 85 | 27.6 (23.6, 32.8), 82                | 28.4 (20.8, 33.9), 83            |
|                                        |                                                 | 4              | 28.3 (23.3, 34.0), 78 | 31.0 (25.7, 35.6), 81                | 28.9 (23.2, 36.4), 79            |
|                                        |                                                 | 8              | 29.0 (24.9, 34.1), 76 | 29.4 (24.7, 35.4), 76                | 27.7 (22.8, 36.9), 78            |
|                                        |                                                 | 16             | 28.4 (23.1, 35.1), 72 | 29.0 (25.2, 34.1), 74                | 28.8 (24.0, 35.8), 78            |
|                                        | Mean change<br>from baseline ( $\pm$<br>SD), n1 | 4              | 0.3 (7.2), 78         | 2.4 (7.1), 81                        | 1.8 (6.5), 79                    |
|                                        |                                                 | 8              | 0.5 (7.8), 76         | 1.3 (7.7), 76                        | 1.8 (9.1), 78                    |
| 16                                     |                                                 | 0.1 (8.0), 72  | 1.1 (8.1), 74         | 2.1 (7.6), 78                        |                                  |
| <b>Monocytes (10<sup>9</sup>/L)</b>    | Median<br>(Q1, Q3), n1                          | BL             | 0.5 (0.3, 0.6), 85    | 0.4 (0.3, 0.6), 82                   | 0.5 (0.4, 0.6), 83               |
|                                        |                                                 | 4              | 0.4 (0.3, 0.5), 78    | 0.5 (0.3, 0.5), 81                   | 0.4 (0.3, 0.6), 79               |
|                                        |                                                 | 8              | 0.5 (0.4, 0.5), 76    | 0.4 (0.3, 0.6), 76                   | 0.5 (0.4, 0.6), 78               |
|                                        |                                                 | 16             | 0.4 (0.3, 0.6), 72    | 0.5 (0.3, 0.6), 74                   | 0.4 (0.3, 0.6), 78               |
|                                        | Mean change<br>from baseline ( $\pm$<br>SD), n1 | 4              | 0 (0.2), 78           | 0 (0.2), 81                          | 0 (0.3), 79                      |
|                                        |                                                 | 8              | 0 (0.2), 76           | 0 (0.2), 76                          | 0 (0.3), 78                      |
| 16                                     |                                                 | 0 (0.2), 72    | 0 (0.2), 74           | -0.1 (0.3), 78                       |                                  |

Dupilumab Lab Safety in Adolescents with Atopic Dermatitis

| Laboratory parameter                   | Measurement                            | Study week                                              | Placebo<br>( <i>n</i> = 85) | Dupilumab 200/300 mg<br>q2w ( <i>n</i> = 82) | Dupilumab 300 mg<br>q4w ( <i>n</i> = 83) |                 |
|----------------------------------------|----------------------------------------|---------------------------------------------------------|-----------------------------|----------------------------------------------|------------------------------------------|-----------------|
| <b>Monocytes/<br/>leukocytes (%)</b>   | Median<br>(Q1, Q3), <i>n</i> 1         | BL                                                      | 5.5 (4.6, 6.8), 85          | 6.1 (4.4, 7.7), 82                           | 6.6 (4.6, 7.8), 83                       |                 |
|                                        |                                        | 4                                                       | 5.8 (4.5, 7.2), 78          | 5.8 (4.5, 6.9), 81                           | 6.0 (5.0, 7.5), 79                       |                 |
|                                        |                                        | 8                                                       | 5.9 (5.1, 7.2), 76          | 5.6 (4.7, 7.1), 76                           | 6.2 (4.8, 7.8), 78                       |                 |
|                                        |                                        | 16                                                      | 6.1 (4.7, 7.7), 72          | 5.9 (4.4, 7.5), 74                           | 6.4 (4.5, 7.5), 78                       |                 |
|                                        | NR (age 13–17 years)<br>All: 2.0–8.0   | Mean change<br>from baseline ( $\pm$<br>SD), <i>n</i> 1 | 4                           | 0.1 (2.1), 78                                | –0.3 (2.5), 81                           | –0.2 (3.5), 79  |
|                                        |                                        |                                                         | 8                           | 0.3 (2.1), 76                                | –0.3 (2.0), 76                           | –0.3 (3.7), 78  |
|                                        |                                        |                                                         | 16                          | 0.4 (2.2), 72                                | –0.1 (2.2), 74                           | –0.5 (3.5), 78  |
| <b>Neutrophils (10<sup>9</sup>/L)</b>  | Median<br>(Q1, Q3), <i>n</i> 1         | BL                                                      | 4.3 (3.2, 5.4), 85          | 4.1 (3.1, 5.4), 82                           | 4.3 (3.2, 5.6), 83                       |                 |
|                                        |                                        | 4                                                       | 3.9 (3.1, 5.6), 78          | 3.9 (3.1, 5.0), 81                           | 3.6 (3.0, 4.8), 79                       |                 |
|                                        |                                        | 8                                                       | 3.9 (3.2, 4.8), 76          | 4.1 (3.4, 4.9), 76                           | 3.9 (3.4, 4.9), 78                       |                 |
|                                        |                                        | 16                                                      | 4.1 (3.2, 5.1), 72          | 3.9 (3.3, 5.0), 74                           | 4.0 (3.1, 5.0), 78                       |                 |
|                                        | NR (age 13–17 years)<br>All: 1.8–8.0   | Mean change<br>from baseline ( $\pm$<br>SD), <i>n</i> 1 | 4                           | 0 (1.6), 78                                  | –0.2 (1.6), 81                           | –0.4 (1.4), 79  |
|                                        |                                        |                                                         | 8                           | –0.3 (1.4), 76                               | –0.2 (1.5), 76                           | –0.3 (1.8), 78  |
|                                        |                                        |                                                         | 16                          | –0.2 (1.6), 72                               | –0.1 (1.9), 74                           | –0.3 (1.6), 78  |
| <b>Neutrophils/<br/>leukocytes (%)</b> | Median<br>(Q1, Q3), <i>n</i> 1         | BL                                                      | 54.2 (45.2, 62.3), 85       | 54.6 (48.0, 61.6), 82                        | 55.2 (46.8, 62.8), 83                    |                 |
|                                        |                                        | 4                                                       | 55.5 (46.9, 61.6), 78       | 53.7 (43.9, 60.2), 81                        | 51.7 (46.3, 60.6), 79                    |                 |
|                                        |                                        | 8                                                       | 55.3 (48.4, 59.9), 76       | 52.8 (47.1, 60.9), 76                        | 51.8 (46.3, 58.0), 78                    |                 |
|                                        |                                        | 16                                                      | 56.1 (44.4, 62.1), 72       | 54.1 (48.8, 60.9), 74                        | 54.8 (47.3, 62.7), 78                    |                 |
|                                        | NR (age 13–17 years)<br>All: 30.0–70.0 | Mean change<br>from baseline ( $\pm$<br>SD), <i>n</i> 1 | 4                           | 0.2 (9.0), 78                                | –2.2 (8.9), 81                           | –2.1 (8.3), 79  |
|                                        |                                        |                                                         | 8                           | –0.3 (9.4), 76                               | –2.3 (9.3), 76                           | –2.9 (11.8), 78 |
|                                        |                                        |                                                         | 16                          | 0.3 (9.7), 72                                | –1.0 (10.0), 74                          | –0.8 (9.5), 78  |

*BL* baseline, *n* total number of patients in the treatment group, *n*1 number of patients at visit, *NR* normal range, *Q*1 quartile 1, *Q*3 quartile 3, *q*2w every 2 weeks, *q*4w every 4 weeks, *SD* standard deviation

**Supplemental Table S3b** Shift from baseline: white blood cells

**Eosinophils ( $\times 10^9/L$ )**

| Study week | Evaluation $n1/n2$ (%) | Placebo ( $n = 85$ ) |              |              | Dupilumab 200/300 mg q2w ( $n = 82$ ) |              |              | Dupilumab 300 mg q4w ( $n = 83$ ) |              |              |
|------------|------------------------|----------------------|--------------|--------------|---------------------------------------|--------------|--------------|-----------------------------------|--------------|--------------|
|            |                        | Baseline status      |              |              |                                       |              |              |                                   |              |              |
|            |                        | Low                  | Normal       | High         | Low                                   | Normal       | High         | Low                               | Normal       | High         |
| 4          | Low                    | 0/0                  | 0/32         | 0/46         | 0/0                                   | 0/35         | 0/46         | 0/0                               | 0/29         | 0/50         |
|            | Normal                 | 0/0                  | 25/32 (78.1) | 9/46 (19.6)  | 0/0                                   | 26/35 (74.3) | 6/46 (13.0)  | 0/0                               | 24/29 (82.8) | 11/50 (22.0) |
|            | High                   | 0/0                  | 7/32 (21.9)  | 37/46 (80.4) | 0/0                                   | 9/35 (25.7)  | 40/46 (87.0) | 0/0                               | 5/29 (17.2)  | 39/50 (78.0) |
| 8          | Low                    | 0/0                  | 0/31         | 0/45         | 0/0                                   | 0/33         | 0/43         | 0/0                               | 0/29         | 0/49         |
|            | Normal                 | 0/0                  | 27/31 (87.1) | 7/45 (15.6)  | 0/0                                   | 21/33 (63.6) | 7/43 (16.3)  | 0/0                               | 23/29 (79.3) | 10/49 (20.4) |
|            | High                   | 0/0                  | 4/31 (12.9)  | 38/45 (84.4) | 0/0                                   | 12/33 (36.4) | 36/43 (83.7) | 0/0                               | 6/29 (20.7)  | 39/49 (79.6) |
| 16         | Low                    | 0/0                  | 0/31         | 0/41         | 0/0                                   | 0/31         | 0/43         | 0/0                               | 0/28         | 0/50         |
|            | Normal                 | 0/0                  | 23/31 (74.2) | 10/41 (24.4) | 0/0                                   | 24/31 (77.4) | 8/43 (18.6)  | 0/0                               | 22/28 (78.6) | 17/50 (34.0) |
|            | High                   | 0/0                  | 8/31 (25.8)  | 31/41 (75.6) | 0/0                                   | 7/31 (22.6)  | 35/43 (81.4) | 0/0                               | 6/28 (21.4)  | 33/50 (66.0) |

**Neutrophils ( $\times 10^9/L$ )**

| Study week | Evaluation $n1/n2$ (%) | Placebo ( $n = 85$ ) |              |           | Dupilumab 200/300 mg q2w ( $n = 82$ ) |              |            | Dupilumab 300 mg q4w ( $n = 83$ ) |              |           |
|------------|------------------------|----------------------|--------------|-----------|---------------------------------------|--------------|------------|-----------------------------------|--------------|-----------|
|            |                        | Baseline status      |              |           |                                       |              |            |                                   |              |           |
|            |                        | Low                  | Normal       | High      | Low                                   | Normal       | High       | Low                               | Normal       | High      |
| 4          | Low                    | 0/1                  | 2/76 (2.6)   | 0/1       | 1/2 (50.0)                            | 0/74         | 0/5        | 0/0                               | 1/78 (1.3)   | 0/1       |
|            | Normal                 | 1/1 (100)            | 71/76 (93.4) | 1/1 (100) | 1/2 (50.0)                            | 73/74 (98.6) | 3/5 (60.0) | 0/0                               | 76/78 (97.4) | 1/1 (100) |
|            | High                   | 0/1                  | 3/76 (3.9)   | 0/1       | 0/2                                   | 1/74 (1.4)   | 2/5 (40.0) | 0/0                               | 1/78 (1.3)   | 0/1       |
| 8          | Low                    | 1/1 (100)            | 0/74         | 0/1       | 1/2 (50.0)                            | 2/69 (2.9)   | 0/5        | 0/0                               | 1/77 (1.3)   | 0/1       |
|            | Normal                 | 0/1                  | 74/74 (100)  | 1/1 (100) | 1/2 (50.0)                            | 67/69 (97.1) | 2/5 (40.0) | 0/0                               | 74/77 (96.1) | 1/1 (100) |
|            | High                   | 0/1                  | 0/74         | 0/1       | 0/2                                   | 0/69         | 3/5 (60.0) | 0/0                               | 2/77 (2.6)   | 0/1       |
| 16         | Low                    | 0/1                  | 1/70 (1.4)   | 0/1       | 0/2                                   | 0/67         | 0/5        | 0/0                               | 1/77 (1.3)   | 0/1       |
|            | Normal                 | 1/1 (100)            | 68/70 (97.1) | 1/1 (100) | 2/2 (100)                             | 66/67 (98.5) | 3/5 (60.0) | 0/0                               | 75/77 (97.4) | 1/1 (100) |
|            | High                   | 0/1                  | 1/70 (1.4)   | 0/1       | 0/2                                   | 1/67 (1.5)   | 2/5 (40.0) | 0/0                               | 1/77 (1.3)   | 0/1       |

$n$  total number of patients in the treatment group,  $n1$  number of patients with evaluation level at visit,  $n2$  number of patients with baseline status,  $q2w$  every 2 weeks,  $q4w$  every 4 weeks

**Supplemental Table S4a** Summary statistics for serum chemistry laboratory parameters: metabolic function

| Laboratory parameter                                                                          | Measurement                                             | Study week        | Placebo<br>( <i>n</i> = 85) | Dupilumab 200/300 mg<br>q2w ( <i>n</i> = 82) | Dupilumab 300 mg<br>q4w ( <i>n</i> = 83) |
|-----------------------------------------------------------------------------------------------|---------------------------------------------------------|-------------------|-----------------------------|----------------------------------------------|------------------------------------------|
| <b>Albumin (g/L)</b><br><br>NR (age 7–17 years)<br>All: 37.0–56.0                             | Median<br>(Q1, Q3), <i>n</i> 1                          | BL                | 46.0 (44.0, 47.0), 85       | 46.0 (43.0, 48.0), 82                        | 46.0 (44.0, 48.0), 83                    |
|                                                                                               |                                                         | 4                 | 46.0 (44.0, 48.0), 81       | 45.0 (44.0, 47.0), 81                        | 46.0 (44.0, 48.0), 81                    |
|                                                                                               |                                                         | 8                 | 46.0 (44.0, 47.0), 80       | 45.0 (44.0, 47.0), 77                        | 46.0 (44.0, 47.5), 80                    |
|                                                                                               |                                                         | 16                | 46.0 (44.0, 47.0), 78       | 45.0 (43.0, 47.0), 76                        | 46.0 (44.0, 47.0), 80                    |
|                                                                                               | Mean change<br>from baseline ( $\pm$<br>SD), <i>n</i> 1 | 4                 | 0.5 (2.8), 81               | -0.3 (2.5), 81                               | -0.2 (3.1), 81                           |
|                                                                                               |                                                         | 8                 | 0 (2.8), 80                 | -0.2 (3.0), 77                               | -0.3 (3.2), 80                           |
| 16                                                                                            |                                                         | -0.3 (3.0), 78    | -0.4 (2.9), 76              | 0.0 (3.4), 80                                |                                          |
| <b>Creatine kinase<br/>(U/L)</b><br><br>NR (age 2–17 years)<br>Male: 50–297<br>Female: 33–198 | Median<br>(Q1, Q3), <i>n</i> 1                          | BL                | 106.0 (78.0, 141.0), 85     | 94.5 (68.0, 132.0), 82                       | 92.0 (68.0, 147.0), 83                   |
|                                                                                               |                                                         | 4                 | 98.5 (77.0, 135.0), 82      | 97.0 (66.0, 140.0), 81                       | 98.0 (69.0, 160), 80                     |
|                                                                                               |                                                         | 8                 | 95.0 (73.5, 121.5), 80      | 101.5 (69.0, 148.5), 76                      | 93.0 (70.0, 151.0), 79                   |
|                                                                                               |                                                         | 16                | 106.0 (77.0, 160.0), 78     | 107.0 (72.0, 152.0), 75                      | 106.5 (77.5, 155.0), 80                  |
|                                                                                               | Mean change<br>from baseline ( $\pm$<br>SD), <i>n</i> 1 | 4                 | -2.9 (65.3), 82             | 8.0 (122.9), 81                              | -3.5 (122.0), 80                         |
|                                                                                               |                                                         | 8                 | -10.9 (58.2), 80            | 15.6 (116.1), 76                             | 2.8 (158.5), 79                          |
| 16                                                                                            |                                                         | 122.8 (676.1), 78 | 3.4 (93.3), 75              | 5.7 (179.0), 80                              |                                          |
| <b>Glucose<br/>(mmol/L)</b><br><br>NR (age 1–17 years)<br>All: 3.6–5.8                        | Median<br>(Q1, Q3), <i>n</i> 1                          | BL                | 4.7 (4.3, 5.0), 85          | 4.7 (4.4, 5.2), 82                           | 4.7 (4.3, 5.2), 83                       |
|                                                                                               |                                                         | 4                 | 4.8 (4.3, 5.2), 82          | 4.7 (4.2, 5.2), 80                           | 4.7 (4.4, 5.1), 80                       |
|                                                                                               |                                                         | 8                 | 4.8 (4.4, 5.1), 79          | 4.9 (4.4, 5.2), 75                           | 4.8 (4.4, 5.2), 79                       |
|                                                                                               |                                                         | 16                | 4.8 (4.5, 5.3), 78          | 4.9 (4.6, 5.2), 75                           | 4.9 (4.4, 5.2), 80                       |
|                                                                                               | Mean change<br>from baseline ( $\pm$<br>SD), <i>n</i> 1 | 4                 | 0.1 (0.9), 82               | 0 (0.7), 80                                  | 0.1 (0.9), 80                            |
|                                                                                               |                                                         | 8                 | 0.1 (0.8), 79               | 0.1 (0.8), 75                                | 0.1 (0.9), 79                            |
| 16                                                                                            |                                                         | 0.2 (0.9), 78     | 0.1 (0.8), 75               | 0.2 (0.9), 80                                |                                          |
| <b>Protein (g/L)</b><br><br>NR (all ages)<br>All: 60.0–80.0                                   | Median<br>(Q1, Q3), <i>n</i> 1                          | BL                | 74.0 (70.0, 76.0), 85       | 74.0 (70.0, 78.0), 82                        | 73.0 (70.0, 75.0), 83                    |
|                                                                                               |                                                         | 4                 | 74.0 (72.0, 77.0), 82       | 73.0 (70.0, 76.0), 81                        | 72.0 (70.0, 75.0), 80                    |
|                                                                                               |                                                         | 8                 | 74.0 (70.0, 77.0), 80       | 73.0 (69.5, 75.0), 76                        | 73.0 (70.0, 75.0), 79                    |
|                                                                                               |                                                         | 16                | 74.0 (71.0, 77.0), 78       | 72.0 (70.0, 75.0), 75                        | 72.0 (70.0, 74.5), 80                    |
|                                                                                               | Mean change<br>from baseline ( $\pm$<br>SD), <i>n</i> 1 | 4                 | 1.3 (4.2), 82               | -0.7 (4.4), 81                               | 0.1 (4.4), 80                            |
|                                                                                               |                                                         | 8                 | 0.9 (4.1), 80               | -1.2 (4.6), 76                               | -0.3 (4.9), 79                           |
| 16                                                                                            |                                                         | 0.7 (4.6), 78     | -1.0 (4.7), 75              | -0.4 (5.6), 80                               |                                          |

*BL* baseline, *n* total number of patients in the treatment group, *n*1 number of patients at visit, *NR* normal range, *Q*1 quartile 1, *Q*3 quartile 3, *q*2w every 2 weeks, *q*4w every 4 weeks, *SD* standard deviation

**Supplemental Table S4b** Summary statistics for serum chemistry laboratory parameters: electrolytes

| Laboratory parameter                                                 | Measurement                               | Study week | Placebo (n = 85)        | Dupilumab 200/300 mg q2w (n = 82) | Dupilumab 300 mg q4w (n = 83) |
|----------------------------------------------------------------------|-------------------------------------------|------------|-------------------------|-----------------------------------|-------------------------------|
| <b>Bicarbonate (mmol/L)</b><br>NR (age 1–17 years)<br>All: 21.0–33.0 | Median (Q1, Q3), n1                       | BL         | 23.0 (21.0, 24.0), 85   | 23.0 (21.0, 25.0), 82             | 23.0 (20.0, 25.0), 83         |
|                                                                      |                                           | 4          | 23.0 (21.0, 24.0), 82   | 24.0 (21.0, 25.0), 80             | 23.0 (21.0, 24.0), 80         |
|                                                                      |                                           | 8          | 23.0 (21.0, 25.0), 80   | 23.0 (21.0, 25.0), 75             | 23.0 (21.0, 25.0), 79         |
|                                                                      |                                           | 16         | 24.0 (22.0, 26.0), 78   | 24.0 (21.0, 25.0), 75             | 23.0 (21.5, 25.0), 80         |
|                                                                      | Mean change from baseline ( $\pm$ SD), n1 | 4          | 0.2 (2.8), 82           | 0.3 (3.4), 80                     | 0.2 (3.1), 80                 |
|                                                                      |                                           | 8          | 0.7 (3.0), 80           | -0.1 (3.4), 75                    | 0.6 (3.5), 79                 |
|                                                                      |                                           | 16         | 1.1 (3.2), 78           | 0.3 (3.3), 75                     | 0.7 (3.7), 80                 |
| <b>Calcium (mmol/L)</b><br>NR (all ages)<br>All: 1.52–3.22           | Median (Q1, Q3), n1                       | BL         | 2.4 (2.3, 2.5), 85      | 2.4 (2.3, 2.5), 82                | 2.4 (2.3, 2.5), 83            |
|                                                                      |                                           | 4          | 2.4 (2.3, 2.5), 81      | 2.4 (2.3, 2.4), 80                | 2.4 (2.3, 2.5), 80            |
|                                                                      |                                           | 8          | 2.4 (2.3, 2.5), 80      | 2.4 (2.3, 2.4), 76                | 2.4 (2.3, 2.4), 80            |
|                                                                      |                                           | 16         | 2.4 (2.4, 2.5), 78      | 2.4 (2.3, 2.4), 76                | 2.4 (2.3, 2.4), 80            |
|                                                                      | Mean change from baseline ( $\pm$ SD), n1 | 4          | 0 (0.1), 81             | 0 (0.1), 80                       | 0 (0.1), 80                   |
|                                                                      |                                           | 8          | 0 (0.1), 80             | 0 (0.1), 76                       | 0 (0.1), 80                   |
|                                                                      |                                           | 16         | 0 (0.1), 78             | 0 (0.1), 76                       | 0 (0.1), 80                   |
| <b>Chloride (mmol/L)</b><br>NR (age 1–17 years)<br>All: 95.0–110.0   | Median (Q1, Q3), n1                       | BL         | 101.0 (99.0, 102.0), 85 | 100.0 (99.0, 102.0), 82           | 101.0 (99.0, 102.0), 83       |
|                                                                      |                                           | 4          | 100.0 (99.0, 101.0), 82 | 100.0 (99.0, 101.0), 81           | 100.0 (99.0, 102.0), 80       |
|                                                                      |                                           | 8          | 100.0 (99.0, 101.0), 80 | 100.0 (99.0, 101.0), 76           | 100.0 (99.0, 102.0), 80       |
|                                                                      |                                           | 16         | 100.0 (99.0, 101.0), 78 | 100.5 (99.0, 102.0), 76           | 100.0 (99.0, 101.0), 80       |
|                                                                      | Mean change from baseline ( $\pm$ SD), n1 | 4          | -0.7 (2.3), 82          | -0.3 (2.3), 81                    | 0.0 (2.2), 80                 |
|                                                                      |                                           | 8          | -0.5 (2.2), 80          | 0.0 (2.3), 76                     | -0.1 (2.4), 80                |
|                                                                      |                                           | 16         | -0.5 (2.2), 78          | 0.0 (2.1), 76                     | -0.4 (2.5), 80                |
| <b>Potassium (mmol/L)</b><br>NR (age 1–17 years)<br>All: 3.5–5.0     | Median (Q1, Q3), n1                       | BL         | 4.2 (4.0, 4.4), 85      | 4.2 (4.0, 4.5), 82                | 4.2 (4.0, 4.4), 83            |
|                                                                      |                                           | 4          | 4.2 (4.0, 4.3), 81      | 4.2 (4.0, 4.3), 81                | 4.2 (4.1, 4.3), 81            |
|                                                                      |                                           | 8          | 4.2 (4.0, 4.5), 80      | 4.2 (4.0, 4.4), 77                | 4.2 (4.1, 4.5), 80            |
|                                                                      |                                           | 16         | 4.2 (4.0, 4.5), 78      | 4.2 (4.0, 4.5), 76                | 4.2 (4.0, 4.4), 80            |
|                                                                      | Mean change from baseline ( $\pm$ SD), n1 | 4          | 0 (0.3), 81             | -0.1 (0.4), 81                    | 0 (0.3), 81                   |
|                                                                      |                                           | 8          | 0 (0.4), 80             | -0.1 (0.3), 77                    | 0 (0.3), 80                   |
|                                                                      |                                           | 16         | 0 (0.3), 78             | 0 (0.4), 76                       | 0 (0.4), 80                   |

Dupilumab Lab Safety in Adolescents with Atopic Dermatitis

| Laboratory parameter                                                      | Measurement                                       | Study week | Placebo<br>( <i>n</i> = 85) | Dupilumab 200/300 mg<br>q2w ( <i>n</i> = 82) | Dupilumab 300 mg<br>q4w ( <i>n</i> = 83) |
|---------------------------------------------------------------------------|---------------------------------------------------|------------|-----------------------------|----------------------------------------------|------------------------------------------|
| <b>Sodium<br/>(mmol/L)</b><br><br>NR (age 1–17 years)<br>All: 133.0–145.0 | Median<br>(Q1, Q3), <i>n1</i>                     | BL         | 140.0 (139.0, 141.0), 85    | 141.0 (139.0, 142.0), 82                     | 140.0 (139.0, 142.0), 83                 |
|                                                                           |                                                   | 4          | 139.0 (138.0, 141.0), 81    | 140.0 (139.0, 141.0), 81                     | 140.0 (139.0, 141.0), 81                 |
|                                                                           |                                                   | 8          | 140.0 (138.0, 141.0), 80    | 140.0 (139.0, 141.0), 77                     | 140.0 (139.0, 141.0), 80                 |
|                                                                           |                                                   | 16         | 140.0 (139.0, 141.0), 78    | 140.0 (139.0, 141.0), 76                     | 140.0 (139.0, 141.0), 80                 |
|                                                                           | Mean change<br>from baseline (±<br>SD), <i>n1</i> | 4          | −0.9 (2.0), 81              | −0.7 (2.6), 81                               | −0.6 (2.0), 81                           |
|                                                                           |                                                   | 8          | −0.5 (2.5), 80              | −0.7 (2.4), 77                               | −0.6 (2.5), 80                           |
|                                                                           |                                                   | 16         | −0.1 (2.5), 78              | −0.6 (2.4), 76                               | −0.6 (2.4), 80                           |

*BL* baseline, *n* total number of patients in the treatment group, *n1* number of patients at visit, *NR* normal range, *Q1* quartile 1, *Q3* quartile 3, *q2w* every 2 weeks, *q4w* every 4 weeks, *SD* standard deviation

**Supplemental Table S4c** Summary statistics for serum chemistry laboratory parameters: renal function

| Laboratory parameter                                                                                 | Measurement                                             | Study week | Placebo<br>( <i>n</i> = 85) | Dupilumab 200/300 mg<br>q2w ( <i>n</i> = 82) | Dupilumab 300 mg<br>q4w ( <i>n</i> = 83) |
|------------------------------------------------------------------------------------------------------|---------------------------------------------------------|------------|-----------------------------|----------------------------------------------|------------------------------------------|
| <b>Blood urea nitrogen (mmol/L)</b><br><br>NR (age 13–17 years)<br>Male: 1.8–7.1<br>Female: 1.4–5.4  | Median<br>(Q1, Q3), <i>n</i> 1                          | BL         | 3.9 (3.2, 5.0), 85          | 3.9 (3.2, 4.6), 82                           | 3.9 (3.2, 5.0), 83                       |
|                                                                                                      |                                                         | 4          | 3.9 (3.2, 5.0), 82          | 4.3 (3.2, 5.0), 81                           | 3.9 (3.2, 5.0), 80                       |
|                                                                                                      |                                                         | 8          | 3.9 (3.2, 4.6), 80          | 4.1 (3.6, 5.0), 76                           | 4.3 (3.6, 5.4), 80                       |
|                                                                                                      |                                                         | 16         | 3.9 (3.2, 4.6), 78          | 3.9 (3.6, 4.3), 76                           | 4.3 (3.6, 5.0), 80                       |
|                                                                                                      | Mean change<br>from baseline ( $\pm$<br>SD), <i>n</i> 1 | 4          | 0 (1.1), 82                 | 0.2 (1.1), 81                                | 0.1 (1.1), 80                            |
|                                                                                                      |                                                         | 8          | -0.1 (1.1), 80              | 0.1 (1.1), 76                                | 0.2 (1.0), 80                            |
|                                                                                                      |                                                         | 16         | -0.1 (1.1), 78              | 0.1 (1.3), 76                                | 0.2 (1.1), 80                            |
|                                                                                                      |                                                         |            |                             |                                              |                                          |
| <b>Creatinine (<math>\mu</math>mol/L)</b><br><br>NR (age 13–18 years)<br>All: 53.0–124.0             | Median<br>(Q1, Q3), <i>n</i> 1                          | BL         | 53.0 (44.0, 62.0), 85       | 53.0 (44.0, 62.0), 82                        | 53.0 (44.0, 62.0), 83                    |
|                                                                                                      |                                                         | 4          | 53.0 (44.0, 62.0), 82       | 44.0 (44.0, 62.0), 80                        | 53.0 (44.0, 62.0), 80                    |
|                                                                                                      |                                                         | 8          | 53.0 (44.0, 62.0), 80       | 44.0 (44.0, 62.0), 75                        | 53.0 (44.0, 62.0), 80                    |
|                                                                                                      |                                                         | 16         | 53.0 (35.0, 62.0), 78       | 53.0 (44.0, 62.0), 76                        | 53.0 (44.0, 62.0), 80                    |
|                                                                                                      | Mean change<br>from baseline ( $\pm$<br>SD), <i>n</i> 1 | 4          | 0.4 (8.2), 82               | -1.6 (10.3), 80                              | -1.8 (7.5), 80                           |
|                                                                                                      |                                                         | 8          | -1.0 (7.6), 80              | -2.3 (8.6), 75                               | -1.4 (9.4), 80                           |
|                                                                                                      |                                                         | 16         | -1.1 (8.7), 78              | -1.3 (8.0), 76                               | 0 (10.2), 80                             |
|                                                                                                      |                                                         |            |                             |                                              |                                          |
| <b>Urate (<math>\mu</math>mol/L)</b><br><br>NR (age 12–19 years)<br>Male: 161–512<br>Female: 178–351 | Median<br>(Q1, Q3), <i>n</i> 1                          | BL         | 333.0 (274.0, 375.0), 85    | 345.0 (297.0, 399.0), 82                     | 333.0 (280.0, 387.0), 83                 |
|                                                                                                      |                                                         | 4          | 330.0 (268.0, 393.0), 82    | 330.0 (286.0, 375.0), 80                     | 327.0 (265.0, 387.0), 80                 |
|                                                                                                      |                                                         | 8          | 330.0 (280.0, 399.0), 80    | 327.0 (274.0, 387.0), 76                     | 333.0 (274.0, 393.0), 79                 |
|                                                                                                      |                                                         | 16         | 333.0 (274.0, 381.0), 78    | 339.0 (286.0, 381.0), 75                     | 315.0 (262.0, 393.0), 80                 |
|                                                                                                      | Mean change<br>from baseline ( $\pm$<br>SD), <i>n</i> 1 | 4          | 1.7 (46.5), 82              | -12.9 (42.8), 80                             | -11.0 (40.5), 80                         |
|                                                                                                      |                                                         | 8          | 3.6 (49.9), 80              | -15.7 (48.5), 76                             | -5.6 (43.8), 79                          |
|                                                                                                      |                                                         | 16         | 1.0 (40.6), 78              | -11.7 (45.8), 75                             | -13.1 (45.7), 80                         |
|                                                                                                      |                                                         |            |                             |                                              |                                          |

*BL* baseline, *n* total number of patients in the treatment group, *n*1 number of patients at visit, *NR* normal range, *Q*1 quartile 1, *Q*3 quartile 3, *q*2w every 2 weeks, *q*4w every 4 weeks, *SD* standard deviation

**Supplemental Table S4d** Summary statistics for serum chemistry laboratory parameters: liver function

| Laboratory parameter                                                                                     | Measurement                                             | Study week | Placebo<br>( <i>n</i> = 85) | Dupilumab 200/300 mg<br>q2w ( <i>n</i> = 82) | Dupilumab 300 mg<br>q4w ( <i>n</i> = 83) |
|----------------------------------------------------------------------------------------------------------|---------------------------------------------------------|------------|-----------------------------|----------------------------------------------|------------------------------------------|
| <b>Alkaline phosphatase (U/L)</b><br><br>NR (age 13–17 years)<br>Male: 52–390<br>Female: 47–162          | Median<br>(Q1, Q3), <i>n</i> 1                          | BL         | 137.0 (95.0, 213.0), 85     | 132.5 (93.0, 199.0), 82                      | 145.0 (100.0, 209.0), 83                 |
|                                                                                                          |                                                         | 4          | 140.0 (95.0, 204.0), 81     | 134.0 (91.0, 207.0), 81                      | 135.0 (100.5, 223.5), 80                 |
|                                                                                                          |                                                         | 8          | 132.5 (93.0, 211.5), 80     | 139.5 (87.5, 215.5), 76                      | 138.0 (91.5, 210.5), 80                  |
|                                                                                                          |                                                         | 16         | 136.5 (93.0, 203.0), 78     | 161.0 (93.5, 221.5), 76                      | 149.5 (104.5, 239.0), 80                 |
|                                                                                                          | Mean change<br>from baseline ( $\pm$<br>SD), <i>n</i> 1 | 4          | –3.4 (33.6), 81             | 1.0 (20.7), 81                               | 3.7 (23.1), 80                           |
|                                                                                                          |                                                         | 8          | –5.9 (25.2), 80             | 5.1 (34.7), 76                               | 1.6 (28.4), 80                           |
|                                                                                                          |                                                         | 16         | –5.7 (32.2), 78             | 12.4 (38.3), 76                              | 5.3 (35.7), 80                           |
| <b>Alanine aminotransferase (U/L)</b><br><br>NR (age 14–17 years)<br>Male: 10.0–45.0<br>Female: 5.0–35.0 | Median<br>(Q1, Q3), <i>n</i> 1                          | BL         | 17.0 (13.0, 22.0), 85       | 19.0 (15.0, 26.0), 82                        | 20.0 (14.0, 25.0), 83                    |
|                                                                                                          |                                                         | 4          | 16.0 (12.0, 19.0), 82       | 16.0 (13.0, 21.5), 80                        | 17.0 (12.0, 22.0), 80                    |
|                                                                                                          |                                                         | 8          | 16.0 (12.5, 20.0), 80       | 15.5 (10.5, 21.0), 76                        | 16.0 (12.0, 22.0), 79                    |
|                                                                                                          |                                                         | 16         | 16.0 (12.0, 20.0), 78       | 16.0 (12.0, 20.0), 75                        | 15.0 (11.0, 19.0), 80                    |
|                                                                                                          | Mean change<br>from baseline ( $\pm$<br>SD), <i>n</i> 1 | 4          | –2.1 (11.1), 82             | –3.7 (12.2), 80                              | –2.1 (6.9), 80                           |
|                                                                                                          |                                                         | 8          | –2.6 (13.4), 80             | –4.4 (15.0), 76                              | –2.5 (9.3), 79                           |
|                                                                                                          |                                                         | 16         | –2.2 (13.8), 78             | –3.4 (20.3), 75                              | –2.9 (8.0), 80                           |
| <b>Aspartate aminotransferase (U/L)</b><br><br>NR (age 1–17 years)<br>All: 11.0–41.0                     | Median<br>(Q1, Q3), <i>n</i> 1                          | BL         | 22.0 (19.0, 27.0), 85       | 24.0 (20.0, 29.0), 82                        | 23.0 (20.0, 29.0), 83                    |
|                                                                                                          |                                                         | 4          | 22.0 (19.0, 25.0), 82       | 22.0 (19.0, 25.0), 80                        | 20.0 (17.0, 24.0), 80                    |
|                                                                                                          |                                                         | 8          | 21.0 (19.0, 24.0), 80       | 20.0 (18.0, 24.0), 76                        | 20.0 (17.0, 25.0), 79                    |
|                                                                                                          |                                                         | 16         | 21.0 (18.0, 26.0), 78       | 21.0 (17.0, 24.0), 75                        | 20.0 (16.5, 24.0), 80                    |
|                                                                                                          | Mean change<br>from baseline ( $\pm$<br>SD), <i>n</i> 1 | 4          | –1.2 (6.7), 82              | –3.5 (9.2), 80                               | –2.7 (6.2), 80                           |
|                                                                                                          |                                                         | 8          | –1.7 (7.0), 80              | –4.1 (9.4), 76                               | –2.3 (7.5), 79                           |
|                                                                                                          |                                                         | 16         | –0.1 (13.0), 78             | –3.7 (13.5), 75                              | –3.4 (6.8), 80                           |
| <b>Direct bilirubin (<math>\mu</math>mol/L)</b><br><br>NR (age 1–17 years)<br>All: 0.0–6.8               | Median<br>(Q1, Q3), <i>n</i> 1                          | BL         | 5.2 (4.5, 5.7), 4           | N/A                                          | 4.8 (4.4, 5.1), 2                        |
|                                                                                                          |                                                         | 4          | 3.8 (1.7, 7.2), 3           | 4.6 (4.6, 4.6), 1                            | 5.4 (5.0, 5.8), 2                        |
|                                                                                                          |                                                         | 8          | 4.3 (1.7, 4.4), 5           | N/A                                          | 4.3 (4.1, 4.4), 3                        |
|                                                                                                          |                                                         | 16         | 4.1 (4.1, 4.1), 1           | 5.1 (5.1, 5.1), 1                            | 3.9 (3.9, 3.9), 1                        |
|                                                                                                          | Mean change<br>from baseline ( $\pm$<br>SD), <i>n</i> 1 | 4          | –0.2 (2.2), 2               | N/A                                          | 0.7 (N/A), 1                             |
|                                                                                                          |                                                         | 8          | –0.6 (0.8), 3               | N/A                                          | –1.0 (N/A), 1                            |
|                                                                                                          |                                                         | 16         | N/A                         | N/A                                          | N/A                                      |



Dupilumab Lab Safety in Adolescents with Atopic Dermatitis

| Laboratory parameter                       | Measurement                                | Study week       | Placebo<br>(n = 85)      | Dupilumab 200/300 mg<br>q2w (n = 82) | Dupilumab 300 mg<br>q4w (n = 83) |
|--------------------------------------------|--------------------------------------------|------------------|--------------------------|--------------------------------------|----------------------------------|
| <b>Bilirubin<br/>(µmol/L)</b>              | Median<br>(Q1, Q3), n1                     | BL               | 4.6 (3.8, 6.8), 85       | 4.8 (3.8, 7.9), 82                   | 5.3 (3.2, 7.7), 83               |
|                                            |                                            | 4                | 4.6 (3.9, 6.3), 82       | 4.6 (3.4, 7.0), 80                   | 5.3 (4.1, 7.8), 80               |
|                                            |                                            | 8                | 5.0 (3.9, 7.8), 80       | 5.5 (3.9, 7.2), 75                   | 5.1 (3.8, 7.9), 79               |
|                                            |                                            | 16               | 5.1 (3.2, 7.7), 78       | 5.3 (3.9, 7.7), 75                   | 4.7 (3.2, 6.9), 80               |
|                                            | Mean change<br>from baseline (±<br>SD), n1 | 4                | 0.2 (2.4), 82            | -0.1 (2.5), 80                       | 0.4 (3.5), 80                    |
|                                            |                                            | 8                | 0.8 (3.7), 80            | 0.0 (2.5), 75                        | 0.9 (3.6), 79                    |
| 16                                         |                                            | 0.2 (3.2), 78    | 0.4 (2.8), 75            | -0.1 (2.3), 80                       |                                  |
| <b>Indirect bilirubin<br/>(µmol/L)</b>     | Median<br>(Q1, Q3), n1                     | BL               | 19.7 (18.0, 23.6), 4     | N/A                                  | 16.4 (15.4, 17.4), 2             |
|                                            |                                            | 4                | 18.5 (15.9, 21.0), 2     | 15.7 (15.7, 15.7), 1                 | 17.5 (15.4, 19.5), 2             |
|                                            |                                            | 8                | 15.0 (14.9, 44.3), 3     | N/A                                  | 21.4 (18.5, 23.9), 3             |
|                                            |                                            | 16               | 15.0 (15.0, 15.0), 1     | 21.0 (21.0, 21.0), 1                 | 16.6 (16.6, 16.6), 1             |
|                                            | Mean change<br>from baseline (±<br>SD), n1 | 4                | -1.3 (3.6), 2            | N/A                                  | 2.1 (N/A), 1                     |
|                                            |                                            | 8                | 2.5 (19.5), 3            | N/A                                  | 1.1 (N/A), 1                     |
| 16                                         |                                            | N/A              | N/A                      | N/A                                  |                                  |
| <b>Lactate<br/>dehydrogenase<br/>(U/L)</b> | Median<br>(Q1, Q3), n1                     | BL               | 259.0 (223.0, 321.0), 85 | 277.0 (213.0, 344.0), 82             | 277.0 (226.0, 365.0), 83         |
|                                            |                                            | 4                | 257.0 (213.0, 314.0), 81 | 217.0 (183.0, 247.0), 81             | 203.5 (182.0, 251.5), 80         |
|                                            |                                            | 8                | 238.0 (202.0, 303.0), 80 | 210.0 (188.0, 245.0), 76             | 204.5 (176.5, 243.5), 80         |
|                                            |                                            | 16               | 245.5 (199.0, 285.0), 78 | 205.0 (185.5, 235.0), 76             | 198.5 (174.0, 228.5), 80         |
|                                            | Mean change<br>from baseline (±<br>SD), n1 | 4                | -11.7 (74.6), 81         | -77.0 (78.5), 81                     | -77.9 (85.6), 80                 |
|                                            |                                            | 8                | -22.8 (83.7), 80         | -82.0 (82.9), 76                     | -84.7 (86.2), 80                 |
| 16                                         |                                            | -28.3 (84.7), 78 | -87.7 (78.6), 76         | -91.9 (84.0), 80                     |                                  |

BL baseline, n total number of patients in the treatment group, n1 number of patients at visit, N/A not available, NR normal range, Q1 quartile 1, Q3 quartile 3, q2w every 2 weeks, q4w every 4 weeks, SD standard deviation

**Supplemental Table S4e** Summary statistics for serum chemistry laboratory parameters: lipid panel

| Laboratory parameter                | Measurement                                            | Study week | Placebo<br>( <i>n</i> = 85) | Dupilumab 200/300 mg<br>q2w ( <i>n</i> = 82) | Dupilumab 300 mg<br>q4w ( <i>n</i> = 83) |
|-------------------------------------|--------------------------------------------------------|------------|-----------------------------|----------------------------------------------|------------------------------------------|
| <b>Cholesterol<br/>(mmol/L)</b>     | Median<br>(Q1, Q3), <i>n1</i>                          | BL         | 3.8 (3.4, 4.3), 85          | 3.8 (3.4, 4.3), 82                           | 3.9 (3.5, 4.4), 83                       |
|                                     |                                                        | 4          | 3.9 (3.5, 4.5), 82          | 3.9 (3.4, 4.3), 81                           | 4.0 (3.5, 4.4), 80                       |
|                                     |                                                        | 8          | 3.8 (3.5, 4.2), 80          | 3.8 (3.4, 4.3), 76                           | 3.9 (3.5, 4.3), 80                       |
|                                     |                                                        | 16         | 3.8 (3.4, 4.4), 78          | 3.8 (3.4, 4.2), 76                           | 3.9 (3.4, 4.3), 80                       |
|                                     | Mean change<br>from baseline ( $\pm$<br>SD), <i>n1</i> | 4          | 0.1 (0.5), 82               | 0.1 (0.5), 81                                | 0.0 (0.5), 80                            |
|                                     |                                                        | 8          | 0.1 (0.4), 80               | 0.0 (0.5), 76                                | 0.0 (0.5), 80                            |
|                                     |                                                        | 16         | 0.0 (0.5), 78               | 0.0 (0.5), 76                                | 0.0 (0.6), 80                            |
| <b>HDL cholesterol<br/>(mmol/L)</b> | Median<br>(Q1, Q3), <i>n1</i>                          | BL         | 1.3 (1.0, 1.4), 85          | 1.2 (1.0, 1.4), 82                           | 1.2 (1.0, 1.4), 83                       |
|                                     |                                                        | 4          | 1.3 (1.1, 1.5), 82          | 1.1 (1.0, 1.3), 81                           | 1.2 (1.0, 1.5), 80                       |
|                                     |                                                        | 8          | 1.2 (1.0, 1.5), 79          | 1.2 (1.0, 1.4), 76                           | 1.2 (1.0, 1.4), 79                       |
|                                     |                                                        | 16         | 1.2 (1.0, 1.4), 78          | 1.2 (1.0, 1.3), 75                           | 1.2 (1.0, 1.4), 80                       |
|                                     | Mean change<br>from baseline ( $\pm$<br>SD), <i>n1</i> | 4          | 0.0 (0.2), 82               | 0.0 (0.2), 81                                | 0.0 (0.2), 80                            |
|                                     |                                                        | 8          | 0.0 (0.2), 79               | 0.0 (0.2), 76                                | 0.0 (0.2), 79                            |
|                                     |                                                        | 16         | 0.0 (0.2), 78               | 0.0 (0.2), 75                                | 0.0 (0.2), 80                            |
| <b>LDL cholesterol<br/>(mmol/L)</b> | Median<br>(Q1, Q3), <i>n1</i>                          | BL         | 2.0 (1.5, 2.4), 83          | 2.0 (1.7, 2.5), 82                           | 2.0 (1.7, 2.5), 83                       |
|                                     |                                                        | 4          | 2.1 (1.7, 2.4), 82          | 1.9 (1.6, 2.4), 79                           | 2.0 (1.7, 2.5), 79                       |
|                                     |                                                        | 8          | 2.0 (1.6, 2.4), 79          | 2.0 (1.6, 2.3), 76                           | 2.0 (1.7, 2.4), 79                       |
|                                     |                                                        | 16         | 2.1 (1.6, 2.4), 78          | 1.9 (1.6, 2.3), 75                           | 2.0 (1.6, 2.5), 79                       |
|                                     | Mean change<br>from baseline ( $\pm$<br>SD), <i>n1</i> | 4          | 0.1 (0.4), 80               | 0.0 (0.4), 79                                | 0.0 (0.4), 79                            |
|                                     |                                                        | 8          | 0.1 (0.3), 77               | 0.0 (0.5), 76                                | 0.0 (0.4), 79                            |
|                                     |                                                        | 16         | 0.0 (0.4), 76               | -0.1 (0.5), 75                               | -0.1 (0.4), 79                           |
| <b>Triglycerides<br/>(mmol/L)</b>   | Median<br>(Q1, Q3), <i>n1</i>                          | BL         | 1.1 (0.8, 1.4), 85          | 1.3 (0.9, 1.8), 82                           | 1.1 (0.8, 1.5), 83                       |
|                                     |                                                        | 4          | 1.1 (0.9, 1.5), 82          | 1.5 (0.9, 2.2), 79                           | 1.2 (0.9, 1.7), 80                       |
|                                     |                                                        | 8          | 1.1 (0.7, 1.8), 79          | 1.4 (0.9, 2.0), 76                           | 1.1 (0.8, 1.9), 79                       |
|                                     |                                                        | 16         | 1.0 (0.8, 1.5), 78          | 1.3 (0.8, 1.9), 75                           | 1.1 (0.8, 1.9), 80                       |
|                                     | Mean change<br>from baseline ( $\pm$<br>SD), <i>n1</i> | 4          | -0.1 (0.8), 82              | 0.3 (0.6), 79                                | 0.1 (0.6), 80                            |
|                                     |                                                        | 8          | 0.0 (0.8), 79               | 0.1 (0.6), 76                                | 0.1 (0.8), 79                            |
|                                     |                                                        | 16         | -0.1 (0.7), 78              | 0.1 (0.6), 75                                | 0.1 (0.7), 80                            |

*BL* baseline, *n* total number of patients in the treatment group, *n1* number of patients at visit, *NR* normal range, *Q1* quartile 1, *Q3* quartile 3, *q2w* every 2 weeks, *q4w* every 4 weeks, *SD* standard deviation

**Supplemental Table S5** Shift from baseline: lactate dehydrogenase (U/L)

| Study week | Evaluation<br><i>n1/n2 (%)</i> | Placebo ( <i>n</i> = 85) |              |             | Dupilumab 200/300 mg q2w ( <i>n</i> = 82) |             |              | Dupilumab 300 mg q4w ( <i>n</i> = 83) |              |              |
|------------|--------------------------------|--------------------------|--------------|-------------|-------------------------------------------|-------------|--------------|---------------------------------------|--------------|--------------|
|            |                                | Baseline status          |              |             |                                           |             |              |                                       |              |              |
|            |                                | Low                      | Normal       | High        | Low                                       | Normal      | High         | Low                                   | Normal       | High         |
| 4          | Low                            | 0/0                      | 0/67         | 0/14        | 0/0                                       | 0/63        | 0/18         | 0/0                                   | 1/63 (1.6)   | 0/17         |
|            | Normal                         | 0/0                      | 65/67 (97.0) | 5/14 (35.7) | 0/0                                       | 63/63 (100) | 17/18 (94.4) | 0/0                                   | 61/63 (96.8) | 15/17 (88.2) |
|            | High                           | 0/0                      | 2/67 (3.0)   | 9/14 (64.3) | 0/0                                       | 0/63        | 1/18 (5.6)   | 0/0                                   | 1/63 (1.6)   | 2/17 (11.8)  |
| 8          | Low                            | 0/0                      | 0/68         | 0/12        | 0/0                                       | 0/58        | 0/18         | 0/0                                   | 0/63         | 0/17         |
|            | Normal                         | 0/0                      | 66/68 (97.1) | 7/12 (58.3) | 0/0                                       | 58/58 (100) | 16/18 (88.9) | 0/0                                   | 63/63 (100)  | 15/17 (88.2) |
|            | High                           | 0/0                      | 2/68 (2.9)   | 5/12 (41.7) | 0/0                                       | 0/58        | 2/18 (11.1)  | 0/0                                   | 0/63         | 2/17 (11.8)  |
| 16         | Low                            | 0/0                      | 0/66         | 0/12        | 0/0                                       | 0/58        | 0/18         | 0/0                                   | 0/63         | 0/17         |
|            | Normal                         | 0/0                      | 63/66 (95.5) | 9/12 (75.0) | 0/0                                       | 58/58 (100) | 16/18 (88.9) | 0/0                                   | 63/63 (100)  | 17/17 (100)  |
|            | High                           | 0/0                      | 3/66 (4.5)   | 3/12 (25.0) | 0/0                                       | 0/58        | 2/18 (11.1)  | 0/0                                   | 0/63         | 0/17         |

*n* total number of patients in the treatment group, *n1* number of patients with evaluation level at visit, *n2* number of patients with baseline status, *q2w* every 2 weeks, *q4w* every 4 weeks

**Supplemental Table S6a** Proportion of patients with grades 1–4 increases in ALP,  $n1/n2$  (%)

| Time point | Grade                                                                                                                                 | Placebo<br>( $n = 85$ ) | Dupilumab<br>200/300 mg q2w<br>( $n = 82$ ) | Dupilumab<br>300 mg q4w<br>( $n = 83$ ) |
|------------|---------------------------------------------------------------------------------------------------------------------------------------|-------------------------|---------------------------------------------|-----------------------------------------|
| Baseline   | Grade 1 (Mild): $> ULN-2.5 \times ULN$ if baseline was normal; $2.0-2.5 \times$ baseline if baseline was abnormal                     | 0/85                    | 0/82                                        | 0/83                                    |
|            | Grade 2 (Moderate): $> 2.5-5.0 \times ULN$ if baseline was normal; $> 2.5-5.0 \times$ baseline if baseline was abnormal               | 0/85                    | 0/82                                        | 0/83                                    |
|            | Grade 3 (Severe): $> 5.0-20.0 \times ULN$ if baseline was normal; $> 5.0-20.0 \times$ baseline if baseline was abnormal               | 0/85                    | 0/82                                        | 0/83                                    |
|            | Grade 4 (Potentially life-threatening): $> 20.0 \times ULN$ if baseline was normal; $> 20.0 \times$ baseline if baseline was abnormal | 0/85                    | 0/82                                        | 0/83                                    |
| Week 4     | Grade 1 (Mild): $> ULN-2.5 \times ULN$ if baseline was normal; $2.0-2.5 \times$ baseline if baseline was abnormal                     | 1/81 (1.2)              | 3/81 (3.7)                                  | 2/80 (2.5)                              |
|            | Grade 2 (Moderate): $> 2.5-5.0 \times ULN$ if baseline was normal; $> 2.5-5.0 \times$ baseline if baseline was abnormal               | 0/81                    | 0/81                                        | 0/80                                    |
|            | Grade 3 (Severe): $> 5.0-20.0 \times ULN$ if baseline was normal; $> 5.0-20.0 \times$ baseline if baseline was abnormal               | 0/81                    | 0/81                                        | 0/80                                    |
|            | Grade 4 (Potentially life-threatening): $> 20.0 \times ULN$ if baseline was normal; $> 20.0 \times$ baseline if baseline was abnormal | 0/81                    | 0/81                                        | 0/80                                    |
| Week 8     | Grade 1 (Mild): $> ULN-2.5 \times ULN$ if baseline was normal; $2.0-2.5 \times$ baseline if baseline was abnormal                     | 4/80 (5.0)              | 4/76 (5.3)                                  | 4/80 (5.0)                              |
|            | Grade 2 (Moderate): $> 2.5-5.0 \times ULN$ if baseline was normal; $> 2.5-5.0 \times$ baseline if baseline was abnormal               | 0/80                    | 0/76                                        | 0/80                                    |
|            | Grade 3 (Severe): $> 5.0-20.0 \times ULN$ if baseline was normal; $> 5.0-20.0 \times$ baseline if baseline was abnormal               | 0/80                    | 0/76                                        | 0/80                                    |
|            | Grade 4 (Potentially life-threatening): $> 20.0 \times ULN$ if baseline was normal; $> 20.0 \times$ baseline if baseline was abnormal | 0/80                    | 0/76                                        | 0/80                                    |
| Week 16    | Grade 1 (Mild): $> ULN-2.5 \times ULN$ if baseline was normal; $2.0-2.5 \times$ baseline if baseline was abnormal                     | 4/78 (5.1)              | 4/76 (5.3)                                  | 4/80 (5.0)                              |
|            | Grade 2 (Moderate): $> 2.5-5.0 \times ULN$ if baseline was normal; $> 2.5-5.0 \times$ baseline if baseline was abnormal               | 0/78                    | 0/76                                        | 0/80                                    |
|            | Grade 3 (Severe): $> 5.0-20.0 \times ULN$ if baseline was normal; $> 5.0-20.0 \times$ baseline if baseline was abnormal               | 0/78                    | 0/76                                        | 0/80                                    |
|            | Grade 4 (Potentially life-threatening): $> 20.0 \times ULN$ if baseline was normal; $> 20.0 \times$ baseline if baseline was abnormal | 0/78                    | 0/76                                        | 0/80                                    |

Patients may have had grades 1 change at more than one time point

ALP alkaline phosphatase,  $n$  total number of patients in the treatment group;  $n1/n2$  number of patients with grade/number of patients assessed at that time point,  $q2w$  every 2 weeks,  $q4w$  every 4 weeks,  $ULN$  upper limit of normal

**Supplemental Table S6b** Proportion of patients with grades 1–4 increases in bilirubin,  $n1/n2$  (%)

| Time point | Grade                                                                                                                                 | Placebo<br>( $n = 85$ ) | Dupilumab<br>200/300 mg q2w<br>( $n = 82$ ) | Dupilumab<br>300 mg q4w<br>( $n = 83$ ) |
|------------|---------------------------------------------------------------------------------------------------------------------------------------|-------------------------|---------------------------------------------|-----------------------------------------|
| Baseline   | Grade 1 (Mild): $> ULN-1.5 \times ULN$ if baseline was normal; $1.0-1.5 \times$ baseline if baseline was abnormal                     | 0/85                    | 0/82                                        | 0/83                                    |
|            | Grade 2 (Moderate): $> 1.5-3.0 \times ULN$ if baseline was normal; $> 1.5-3.0 \times$ baseline if baseline was abnormal               | 0/85                    | 0/82                                        | 0/83                                    |
|            | Grade 3 (Severe): $> 3.0-10.0 \times ULN$ if baseline was normal; $> 3.0-10.0 \times$ baseline if baseline was abnormal               | 0/85                    | 0/82                                        | 0/83                                    |
|            | Grade 4 (Potentially life-threatening): $> 10.0 \times ULN$ if baseline was normal; $> 10.0 \times$ baseline if baseline was abnormal | 0/85                    | 0/82                                        | 0/83                                    |
| Week 4     | Grade 1 (Mild): $> ULN-1.5 \times ULN$ if baseline was normal; $1.0-1.5 \times$ baseline if baseline was abnormal                     | 2/82 (2.4)              | 1/80 (1.3)                                  | 2/80 (2.5)                              |
|            | Grade 2 (Moderate): $> 1.5-3.0 \times ULN$ if baseline was normal; $> 1.5-3.0 \times$ baseline if baseline was abnormal               | 0/82                    | 0/80                                        | 0/80                                    |
|            | Grade 3 (Severe): $> 3.0-10.0 \times ULN$ if baseline was normal; $> 3.0-10.0 \times$ baseline if baseline was abnormal               | 0/82                    | 0/80                                        | 0/80                                    |
|            | Grade 4 (Potentially life-threatening): $> 10.0 \times ULN$ if baseline was normal; $> 10.0 \times$ baseline if baseline was abnormal | 0/82                    | 0/80                                        | 0/80                                    |
| Week 8     | Grade 1 (Mild): $> ULN-1.5 \times ULN$ if baseline was normal; $1.0-1.5 \times$ baseline if baseline was abnormal                     | 2/80 (2.5)              | 0/75                                        | 3/79 (3.8)                              |
|            | Grade 2 (Moderate): $> 1.5-3.0 \times ULN$ if baseline was normal; $> 1.5-3.0 \times$ baseline if baseline was abnormal               | 1/80 (1.3)              | 0/75                                        | 0/79                                    |
|            | Grade 3 (Severe): $> 3.0-10.0 \times ULN$ if baseline was normal; $> 3.0-10.0 \times$ baseline if baseline was abnormal               | 0/80                    | 0/75                                        | 0/79                                    |
|            | Grade 4 (Potentially life-threatening): $> 10.0 \times ULN$ if baseline was normal; $> 10.0 \times$ baseline if baseline was abnormal | 0/80                    | 0/75                                        | 0/79                                    |
| Week 16    | Grade 1 (Mild): $> ULN-1.5 \times ULN$ if baseline was normal; $1.0-1.5 \times$ baseline if baseline was abnormal                     | 1/78 (1.3)              | 1/75 (1.3)                                  | 1/80 (1.3)                              |
|            | Grade 2 (Moderate): $> 1.5-3.0 \times ULN$ if baseline was normal; $> 1.5-3.0 \times$ baseline if baseline was abnormal               | 0/78                    | 0/75                                        | 0/80                                    |
|            | Grade 3 (Severe): $> 3.0-10.0 \times ULN$ if baseline was normal; $> 3.0-10.0 \times$ baseline if baseline was abnormal               | 0/78                    | 0/75                                        | 0/80                                    |
|            | Grade 4 (Potentially life-threatening): $> 10.0 \times ULN$ if baseline was normal; $> 10.0 \times$ baseline if baseline was abnormal | 0/78                    | 0/75                                        | 0/80                                    |

Patients may have had grades 1 changes at more than one time point

$n$  total number of patients in the treatment group,  $n1/n2$  number of patients with grade/number of patients assessed at that time point,  $q2w$  every 2 weeks,  $q4w$  every 4 weeks,  $ULN$  upper limit of normal

**Supplemental Table S6c** Proportion of patients with grades 1–4 increases in ALT,  $n1/n2$  (%)

| Time point | Grade                                                                                                                                 | Placebo<br>( $n = 85$ ) | Dupilumab<br>200/300 mg q2w<br>( $n = 82$ ) | Dupilumab<br>300 mg q4w<br>( $n = 83$ ) |
|------------|---------------------------------------------------------------------------------------------------------------------------------------|-------------------------|---------------------------------------------|-----------------------------------------|
| Baseline   | Grade 1 (Mild): $> ULN-3.0 \times ULN$ if baseline was normal; $1.5-3.0 \times$ baseline if baseline was abnormal                     | 0/85                    | 0/82                                        | 0/83                                    |
|            | Grade 2 (Moderate): $> 3.0-5.0 \times ULN$ if baseline was normal; $> 3.0-5.0 \times$ baseline if baseline was abnormal               | 0/85                    | 0/82                                        | 0/83                                    |
|            | Grade 3 (Severe): $> 5.0-20.0 \times ULN$ if baseline was normal; $> 5.0-20.0 \times$ baseline if baseline was abnormal               | 0/85                    | 0/82                                        | 0/83                                    |
|            | Grade 4 (Potentially life-threatening): $> 20.0 \times ULN$ if baseline was normal; $> 20.0 \times$ baseline if baseline was abnormal | 0/85                    | 0/82                                        | 0/83                                    |
| Week 4     | Grade 1 (Mild): $> ULN-3.0 \times ULN$ if baseline was normal; $1.5-3.0 \times$ baseline if baseline was abnormal                     | 4/82 (4.9)              | 3/80 (3.8)                                  | 3/80 (3.8)                              |
|            | Grade 2 (Moderate): $> 3.0-5.0 \times ULN$ if baseline was normal; $> 3.0-5.0 \times$ baseline if baseline was abnormal               | 0/82                    | 0/80                                        | 0/80                                    |
|            | Grade 3 (Severe): $> 5.0-20.0 \times ULN$ if baseline was normal; $> 5.0-20.0 \times$ baseline if baseline was abnormal               | 0/82                    | 0/80                                        | 0/80                                    |
|            | Grade 4 (Potentially life-threatening): $> 20.0 \times ULN$ if baseline was normal; $> 20.0 \times$ baseline if baseline was abnormal | 0/82                    | 0/80                                        | 0/80                                    |
| Week 8     | Grade 1 (Mild): $> ULN-3.0 \times ULN$ if baseline was normal; $1.5-3.0 \times$ baseline if baseline was abnormal                     | 2/80 (2.5)              | 1/76 (1.3)                                  | 3/79 (3.8)                              |
|            | Grade 2 (Moderate): $> 3.0-5.0 \times ULN$ if baseline was normal; $> 3.0-5.0 \times$ baseline if baseline was abnormal               | 1/80 (1.3)              | 0/76                                        | 0/79                                    |
|            | Grade 3 (Severe): $> 5.0-20.0 \times ULN$ if baseline was normal; $> 5.0-20.0 \times$ baseline if baseline was abnormal               | 0/80                    | 0/76                                        | 0/79                                    |
|            | Grade 4 (Potentially life-threatening): $> 20.0 \times ULN$ if baseline was normal; $> 20.0 \times$ baseline if baseline was abnormal | 0/80                    | 0/76                                        | 0/79                                    |
| Week 16    | Grade 1 (Mild): $> ULN-3.0 \times ULN$ if baseline was normal; $1.5-3.0 \times$ baseline if baseline was abnormal                     | 4/78 (5.1)              | 0/75                                        | 3/80 (3.8)                              |
|            | Grade 2 (Moderate): $> 3.0-5.0 \times ULN$ if baseline was normal; $> 3.0-5.0 \times$ baseline if baseline was abnormal               | 0/78                    | 1/75 (1.3)                                  | 0/80                                    |
|            | Grade 3 (Severe): $> 5.0-20.0 \times ULN$ if baseline was normal; $> 5.0-20.0 \times$ baseline if baseline was abnormal               | 0/78                    | 0/75                                        | 0/80                                    |
|            | Grade 4 (Potentially life-threatening): $> 20.0 \times ULN$ if baseline was normal; $> 20.0 \times$ baseline if baseline was abnormal | 0/78                    | 0/75                                        | 0/80                                    |

Patients may have had grades 1–2 changes at more than one time point

ALT alanine aminotransferase,  $n$  total number of patients in the treatment group,  $n1/n2$  number of patients with grade/number of patients assessed at that time point,  $q2w$  every 2 weeks,  $q4w$  every 4 weeks,  $ULN$  upper limit of normal

**Supplemental Table S6d** Proportion of patients with grades 1–4 increases in AST,  $n1/n2$  (%)

| Time point | Grade                                                                                                                                 | Placebo<br>( $n = 85$ ) | Dupilumab<br>200/300 mg q2w<br>( $n = 82$ ) | Dupilumab<br>300 mg q4w<br>( $n = 83$ ) |
|------------|---------------------------------------------------------------------------------------------------------------------------------------|-------------------------|---------------------------------------------|-----------------------------------------|
| Baseline   | Grade 1 (Mild): $> ULN-3.0 \times ULN$ if baseline was normal; $1.5-3.0 \times$ baseline if baseline was abnormal                     | 0/85                    | 0/82                                        | 0/83                                    |
|            | Grade 2 (Moderate): $> 3.0-5.0 \times ULN$ if baseline was normal; $> 3.0-5.0 \times$ baseline if baseline was abnormal               | 0/85                    | 0/82                                        | 0/83                                    |
|            | Grade 3 (Severe): $> 5.0-20.0 \times ULN$ if baseline was normal; $> 5.0-20.0 \times$ baseline if baseline was abnormal               | 0/85                    | 0/82                                        | 0/83                                    |
|            | Grade 4 (Potentially life-threatening): $> 20.0 \times ULN$ if baseline was normal; $> 20.0 \times$ baseline if baseline was abnormal | 0/85                    | 0/82                                        | 0/83                                    |
| Week 4     | Grade 1 (Mild): $> ULN-3.0 \times ULN$ if baseline was normal; $1.5-3.0 \times$ baseline if baseline was abnormal                     | 0/82                    | 1/80 (1.3)                                  | 1/80 (1.3)                              |
|            | Grade 2 (Moderate): $> 3.0-5.0 \times ULN$ if baseline was normal; $> 3.0-5.0 \times$ baseline if baseline was abnormal               | 0/82                    | 0/80                                        | 0/80                                    |
|            | Grade 3 (Severe): $> 5.0-20.0 \times ULN$ if baseline was normal; $> 5.0-20.0 \times$ baseline if baseline was abnormal               | 0/82                    | 0/80                                        | 0/80                                    |
|            | Grade 4 (Potentially life-threatening): $> 20.0 \times ULN$ if baseline was normal; $> 20.0 \times$ baseline if baseline was abnormal | 0/82                    | 0/80                                        | 0/80                                    |
| Week 8     | Grade 1 (Mild): $> ULN-3.0 \times ULN$ if baseline was normal; $1.5-3.0 \times$ baseline if baseline was abnormal                     | 0/80                    | 2/76 (2.6)                                  | 2/79 (2.5)                              |
|            | Grade 2 (Moderate): $> 3.0-5.0 \times ULN$ if baseline was normal; $> 3.0-5.0 \times$ baseline if baseline was abnormal               | 0/80                    | 0/76                                        | 0/79                                    |
|            | Grade 3 (Severe): $> 5.0-20.0 \times ULN$ if baseline was normal; $> 5.0-20.0 \times$ baseline if baseline was abnormal               | 0/80                    | 0/76                                        | 0/79                                    |
|            | Grade 4 (Potentially life-threatening): $> 20.0 \times ULN$ if baseline was normal; $> 20.0 \times$ baseline if baseline was abnormal | 0/80                    | 0/76                                        | 0/79                                    |
| Week 16    | Grade 1 (Mild): $> ULN-3.0 \times ULN$ if baseline was normal; $1.5-3.0 \times$ baseline if baseline was abnormal                     | 3/78 (3.8)              | 1/75 (1.3)                                  | 2/80 (2.5)                              |
|            | Grade 2 (Moderate): $> 3.0-5.0 \times ULN$ if baseline was normal; $> 3.0-5.0 \times$ baseline if baseline was abnormal               | 0/78                    | 1/75 (1.3)                                  | 0/80                                    |
|            | Grade 3 (Severe): $> 5.0-20.0 \times ULN$ if baseline was normal; $> 5.0-20.0 \times$ baseline if baseline was abnormal               | 0/78                    | 0/75                                        | 0/80                                    |
|            | Grade 4 (Potentially life-threatening): $> 20.0 \times ULN$ if baseline was normal; $> 20.0 \times$ baseline if baseline was abnormal | 0/78                    | 0/75                                        | 0/80                                    |

Patients may have had grades 1–2 changes at more than one time point

AST aspartate aminotransferase,  $n$  total number of patients in the treatment group,  $n1/n2$  number of patients with grade/number of patients assessed at that time point,  $q2w$  every 2 weeks,  $q4w$  every 4 weeks,  $ULN$  upper limit of normal

**Supplemental Table S6e** Proportion of patients with Grades 1–4 increases in creatinine,  $n1/n2$  (%)

| Time point | Grade                                                                   | Placebo<br>( $n = 85$ ) | Dupilumab<br>200/300 mg q2w ( $n = 82$ ) | Dupilumab<br>300 mg q4w<br>( $n = 83$ ) |
|------------|-------------------------------------------------------------------------|-------------------------|------------------------------------------|-----------------------------------------|
| Baseline   | Grade 1 (Mild): $> ULN-1.5 \times ULN$                                  | 0/85                    | 0/82                                     | 0/83                                    |
|            | Grade 2 (Moderate): $> 1.5-3.0 \times$ baseline; $> 1.5-3.0 \times ULN$ | 0/85                    | 0/82                                     | 0/83                                    |
|            | Grade 3 (Severe): $> 3.0 \times$ baseline; $> 3.0-6.0 \times ULN$       | 0/85                    | 0/82                                     | 0/83                                    |
|            | Grade 4 (Potentially life-threatening): $> 6.0 \times ULN$              | 0/85                    | 0/82                                     | 0/83                                    |
| Week 4     | Grade 1 (Mild): $> ULN-1.5 \times ULN$                                  | 0/82                    | 0/80                                     | 0/80                                    |
|            | Grade 2 (Moderate): $> 1.5-3.0 \times$ baseline; $> 1.5-3.0 \times ULN$ | 3/82 (3.7)              | 3/80 (3.8)                               | 1/80 (1.3)                              |
|            | Grade 3 (Severe): $> 3.0 \times$ baseline; $> 3.0-6.0 \times ULN$       | 0/82                    | 0/80                                     | 0/80                                    |
|            | Grade 4 (Potentially life-threatening): $> 6.0 \times ULN$              | 0/82                    | 0/80                                     | 0/80                                    |
| Week 8     | Grade 1 (Mild): $> ULN-1.5 \times ULN$                                  | 0/80                    | 0/75                                     | 0/80                                    |
|            | Grade 2 (Moderate): $> 1.5-3.0 \times$ baseline; $> 1.5-3.0 \times ULN$ | 0/80                    | 1/75 (1.3)                               | 1/80 (1.3)                              |
|            | Grade 3 (Severe): $> 3.0 \times$ baseline; $> 3.0-6.0 \times ULN$       | 0/80                    | 0/75                                     | 0/80                                    |
|            | Grade 4 (Potentially life-threatening): $> 6.0 \times ULN$              | 0/80                    | 0/75                                     | 0/80                                    |
| Week 16    | Grade 1 (Mild): $> ULN-1.5 \times ULN$                                  | 0/78                    | 0/76                                     | 0/80                                    |
|            | Grade 2 (Moderate): $> 1.5-3.0 \times$ baseline; $> 1.5-3.0 \times ULN$ | 3/78 (3.8)              | 1/76 (1.3)                               | 3/80 (3.8)                              |
|            | Grade 3 (Severe): $> 3.0 \times$ baseline; $> 3.0-6.0 \times ULN$       | 0/78                    | 0/76                                     | 0/80                                    |
|            | Grade 4 (Potentially life-threatening): $> 6.0 \times ULN$              | 0/78                    | 0/76                                     | 0/80                                    |

Patients may have had grades 1–2 changes at more than one time point

$n$  total number of patients in the treatment group,  $n1/n2$  number of patients with grade/number of patients assessed at that time point,  $q2w$  every 2 weeks,  $q4w$  every 4 weeks,  $ULN$  upper limit of normal



**Supplemental Table S6f** Proportion of patients with Grades 1–4 increases in potassium,  $n1/n2$  (%)

| Time point | Grade                                                | Placebo<br>( $n = 85$ ) | Dupilumab<br>200/300 mg q2w<br>( $n = 82$ ) | Dupilumab<br>300 mg q4w<br>( $n = 83$ ) |
|------------|------------------------------------------------------|-------------------------|---------------------------------------------|-----------------------------------------|
| Baseline   | Grade 1 (Mild): > ULN–5.5 mmol/L                     | 0/85                    | 2/82 (2.4)                                  | 0/83                                    |
|            | Grade 2 (Moderate): > 5.5–6.0 mmol/L                 | 0/85                    | 0/82                                        | 0/83                                    |
|            | Grade 3 (Severe): > 6.0–7.0 mmol/L                   | 0/85                    | 0/82                                        | 0/83                                    |
|            | Grade 4 (Potentially life-threatening): > 7.0 mmol/L | 0/85                    | 0/82                                        | 0/83                                    |
| Week 4     | Grade 1 (Mild): > ULN–5.5 mmol/L                     | 1/81 (1.2)              | 0/81                                        | 1/81 (1.2)                              |
|            | Grade 2 (Moderate): > 5.5–6.0 mmol/L                 | 0/81                    | 0/81                                        | 0/81                                    |
|            | Grade 3 (Severe): > 6.0–7.0 mmol/L                   | 0/81                    | 0/81                                        | 0/81                                    |
|            | Grade 4 (Potentially life-threatening): > 7.0 mmol/L | 0/81                    | 0/81                                        | 0/81                                    |
| Week 8     | Grade 1 (Mild): > ULN–5.5 mmol/L                     | 1/80 (1.3)              | 0/77                                        | 0/80                                    |
|            | Grade 2 (Moderate): > 5.5–6.0 mmol/L                 | 0/80                    | 0/77                                        | 0/80                                    |
|            | Grade 3 (Severe): > 6.0–7.0 mmol/L                   | 0/80                    | 0/77                                        | 0/80                                    |
|            | Grade 4 (Potentially life-threatening): > 7.0 mmol/L | 0/80                    | 0/77                                        | 0/80                                    |
| Week 16    | Grade 1 (Mild): > ULN–5.5 mmol/L                     | 1/78 (1.3)              | 1/76 (1.3)                                  | 1/80 (1.3)                              |
|            | Grade 2 (Moderate): > 5.5–6.0 mmol/L                 | 0/78                    | 1/76 (1.3)                                  | 0/80                                    |
|            | Grade 3 (Severe): > 6.0–7.0 mmol/L                   | 0/78                    | 0/76                                        | 0/80                                    |
|            | Grade 4 (Potentially life-threatening): > 7.0 mmol/L | 0/78                    | 0/76                                        | 0/80                                    |

Patients may have had grades 1–2 changes at more than one time point

$n$  total number of patients in the treatment group,  $n1/n2$  number of patients with grade/number of patients assessed at that time point,  $q2w$  every 2 weeks,  $q4w$  every 4 weeks,  $ULN$  upper limit of normal

**Supplemental Table S7** Summary statistics for urinalysis laboratory parameters

| Laboratory parameter                                         | Measurement                                       | Study week | Placebo<br>( <i>n</i> = 85) | Dupilumab 200/300 mg<br>q2w ( <i>n</i> = 82) | Dupilumab 300 mg<br>q4w ( <i>n</i> = 83) |
|--------------------------------------------------------------|---------------------------------------------------|------------|-----------------------------|----------------------------------------------|------------------------------------------|
| <b>Specific gravity</b><br>NR (all ages)<br>All: 1.002–1.035 | Median<br>(Q1, Q3), <i>n1</i>                     | BL         | 1.0 (1.0, 1.0), 66          | 1.0 (1.0, 1.0), 68                           | 1.0 (1.0, 1.0), 63                       |
|                                                              |                                                   | 4          | N/A                         | N/A                                          | N/A                                      |
|                                                              |                                                   | 8          | N/A                         | N/A                                          | N/A                                      |
|                                                              |                                                   | 16         | 1.0 (1.0, 1.0), 14          | 1.0 (1.0, 1.0), 19                           | 1.0 (1.0, 1.0), 17                       |
|                                                              | Mean change<br>from baseline (±<br>SD), <i>n1</i> | 4          | N/A                         | N/A                                          | N/A                                      |
|                                                              |                                                   | 8          | N/A                         | N/A                                          | N/A                                      |
|                                                              |                                                   | 16         | 0 (0), 14                   | 0 (0), 19                                    | 0.0 (0.0), 17                            |
|                                                              |                                                   |            |                             |                                              |                                          |
| <b>pH</b><br>NR (all ages)<br>All: 5.0–8.0                   | Median<br>(Q1, Q3), <i>n1</i>                     | BL         | 6.0 (6.0, 6.5), 66          | 6.0 (6.0, 6.5), 68                           | 6.0 (6.0, 7.0), 63                       |
|                                                              |                                                   | 4          | N/A                         | N/A                                          | N/A                                      |
|                                                              |                                                   | 8          | N/A                         | N/A                                          | N/A                                      |
|                                                              |                                                   | 16         | 6.3 (6.0, 6.5), 14          | 6.0 (6.0, 6.5), 19                           | 6.5 (6.0, 7.0), 17                       |
|                                                              | Mean change<br>from baseline (±<br>SD), <i>n1</i> | 4          | N/A                         | N/A                                          | N/A                                      |
|                                                              |                                                   | 8          | N/A                         | N/A                                          | N/A                                      |
|                                                              |                                                   | 16         | 0.1 (0.7), 14               | −0.1 (0.6), 19                               | 0 (0.5), 17                              |
|                                                              |                                                   |            |                             |                                              |                                          |

*BL* baseline, *n* total number of patients in the treatment group, *n1* number of patients at visit, *N/A* not available, *NR* normal range, *Q1* quartile 1, *Q3* quartile 3, *q2w* every 2 weeks, *q4w* every 4 weeks, *SD* standard deviation
